# Supplementary material
Source: publisher figshare collection journal article supplement (https://acs.figshare.com/ndownloader/files/25012297)
Supplement: Supplementary file 1 [file 25012297]

## Supporting Information for

### **Solution processable *meso*-triarylamine functionalized porphyrins with high mobility and ON/OFF ratio in bottom-gated OFETs**

Komal Kurlekar,<sup>†</sup> AnshikaAnjali,<sup>†</sup> Srinitha Sonalin,<sup>†</sup> Predhanekar Mohamed Imran,<sup>‡</sup>  
Samuthira Nagarajan<sup>\*†</sup>

<sup>†</sup>Department of Chemistry, Central University of Tamil Nadu, Thiruvarur- 610 005, India

\*Email: [snagarajan@cutn.ac.in](mailto:snagarajan@cutn.ac.in)

<sup>‡</sup>Department of Chemistry, Islamiah College, Vaniyambadi - 635 752, India

## **Table of content**

|                                                                                    |         |
|------------------------------------------------------------------------------------|---------|
| Materials and methods.                                                             | S4      |
| Experimental procedures.                                                           | S5-S11  |
| <b>Figure S1.</b> DSC thermogram of compounds.                                     | S12     |
| <b>Figure S2.</b> TGA curves of compounds.                                         | S12     |
| <b>Table S1.</b> Melting point and decomposition temperature for 10 % weight loss. | S13     |
| <b>Figure S3.</b> GIXRD of compounds <b>5a-e</b> .                                 | S13     |
| <b>Table S2.</b> Electronic absorption behavior of compounds <b>5a-e</b> .         | S14     |
| <b>Figure S4.</b> Generalized representation of the molecule.                      | S14     |
| <b>Figure S5.</b> Molecular packing of compounds <b>5a-e</b> .                     | S15-S17 |
| <b>Figure S6.</b> Optimized geometry of compounds <b>5a-e</b> .                    | S17-S19 |
| <b>Table S3.</b> Grain size of compounds <b>5a-e</b> .                             | S20     |
| <b>Table S4.</b> d-spacing of compounds <b>5a-e</b> .                              | S20     |
| <b>Figure S7.</b> Schematic representation of OFET device.                         | S20     |
| <b>Figure S8.</b> $^1\text{H}$ and $^{13}\text{C}$ NMR spectra of <b>3a</b> .      | S22     |
| <b>Figure S9.</b> HR-Mass spectrum of <b>3a</b> .                                  | S23     |
| <b>Figure S10.</b> $^1\text{H}$ and $^{13}\text{C}$ NMR spectra of <b>3b</b> .     | S24     |
| <b>Figure S11.</b> HR-Mass spectrum of <b>3b</b> .                                 | S25     |
| <b>Figure S12.</b> $^1\text{H}$ and $^{13}\text{C}$ NMR spectra of <b>3c</b> .     | S26     |
| <b>Figure S13.</b> HR-Mass spectrum of <b>3c</b> .                                 | S27     |
| <b>Figure S14.</b> $^1\text{H}$ and $^{13}\text{C}$ NMR spectra of <b>3d</b> .     | S28     |
| <b>Figure S15.</b> HR-Mass spectrum of <b>3d</b> .                                 | S29     |
| <b>Figure S16.</b> $^1\text{H}$ and $^{13}\text{C}$ NMR spectra of <b>3e</b> .     | S30     |
| <b>Figure S17.</b> HR-Mass spectrum of <b>3e</b> .                                 | S31     |
| <b>Figure S18.</b> $^1\text{H}$ and $^{13}\text{C}$ NMR spectra <b>4</b> .         | S32     |
| <b>Figure S19.</b> HR-Mass spectrum of <b>4</b> .                                  | S33     |
| <b>Figure S20.</b> $^1\text{H}$ and $^{13}\text{C}$ NMR spectra of <b>5a</b> .     | S34     |
| <b>Figure S21.</b> HR-Mass spectrum of <b>5a</b> .                                 | S35     |
| <b>Figure S22.</b> $^1\text{H}$ and $^{13}\text{C}$ NMR spectra of <b>5b</b> .     | S36     |
| <b>Figure S23.</b> MALDI-TOFspectrum of <b>5b</b> .                                | S37     |
| <b>Figure S24.</b> $^1\text{H}$ and $^{13}\text{C}$ NMR spectra of <b>5c</b> .     | S38     |
| <b>Figure S25.</b> MALDI-TOFspectrum of <b>5c</b> .                                | S39     |
| <b>Figure S26.</b> $^1\text{H}$ and $^{13}\text{C}$ NMR spectra of <b>5d</b> .     | S40     |
| <b>Figure S27.</b> MALDI-TOF spectrum of <b>5d</b> .                               | S41     |

**Figure S28.**  $^1\text{H}$  and  $^{13}\text{C}$  NMR spectra of **5e**.

S42

**Figure S29.** MALDI-TOFspectrum of **5e**.

S43

## Materials and methods

Triphenylamine,  $\text{POCl}_3$ , tetrakis(triphenylphosphine)palladium, and all the boronic acids (thiophene-3-boronic acid, benzeneboronic acid, 3-fluoroboronic acid, 4-methoxyphenylboronic acid, 3-trifluoromethylboronic acid), pyrrole, *p*-formaldehyde, indium trichloride ( $\text{InCl}_3$ ), 2,3-dichloro-5,6-dicyano-1,4-benzoquinone (DDQ), trifluoroacetic acid (TFA), were used as purchased from the commercial sources. N, N-Dimethylformamide (DMF) and triethylamine used were anhydrous. All the other solvents (AR grade) were used as received.  $^1\text{H}$  NMR and  $^{13}\text{C}$  NMR were recorded in Bruker 400 MHz spectrometer in  $\text{CDCl}_3$ . Chemical shifts are reported against TMS. Absorption spectra of compounds were recorded by JASCO UV-NIR spectrophotometer. Fluorescence measurements were obtained from Perkin Elmer Spectrofluorimeter LS55. Thermal studies carried out in TA thermal analyzer. Electrochemical studies were done with CH Instruments: Electrochemical workstation (CHI 6035D). High-resolution mass spectra were recorded in ThermoExactivePlus UHPLC-MS. Keithley semiconductor parameter analyzer 4200 SCS was employed to determine the organic field-effect transistor behavior (OFET) of the compounds.

## Experimental procedure

### 4-(Bis(4-iodophenyl)amino)benzaldehyde (2):

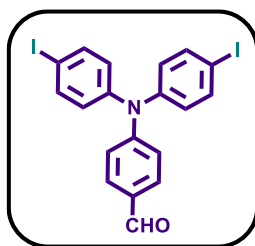

**Compound 1:** DMF (2 ml, 25.9 mmol) was transferred into 100 ml RB and maintained at  $0^\circ\text{C}$ . To this  $\text{POCl}_3$  (1.9 ml, 20.4 mmol) was added dropwise for 20 min. Triphenylamine (TPA) (1 g, 4.0 mmol) was added at room temperature, during which the solution color changed to pale yellow, and stirred for 1 h. The reaction mixture was then heated to  $45^\circ\text{C}$  and stirred for an additional 2 h. The resultant mixture was poured into an ice bath and neutralized with sodium bicarbonate. The solution was extracted with dichloromethane and distilled water.<sup>1</sup> The pale yellow solid (1 g, 92 %) was purified by column chromatography using silica gel (v/v hexane-ethyl acetate: 9/1).

**Compound 2:** Under rapid stirring, compound **1** (1 g, 3.6 mmol) was dissolved in glacial acetic acid (10 ml). KI (1.2 g, 7.3 mmol) and  $\text{KIO}_3$  (2.3 g, 10.9 mmol) were added to the reaction mixture and stirred for 6 h at  $70^\circ\text{C}$ . After cooling, the reaction was quenched with sodium thiosulphate solution. Solid yellow powder formed was filtered and washed with water. The pure product (1.8 g, 98 %) was purified by column chromatography using silica gel (v/v hexane-ethyl acetate = 9/1).

### General procedure for Suzuki coupling reaction (3):

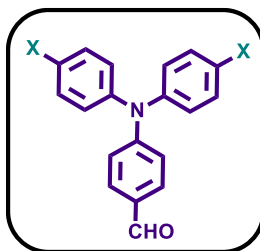

Compound **2** was dissolved in THF, to the solution 10 mol % of  $\text{Pd(PPh}_3)_4$  was added at room temperature and stirred for 10 min under nitrogen atmosphere. Aqueous solution of  $\text{Na}_2\text{CO}_3$  (2 M) was added and stirred for 20 min at room temperature. The temperature was raised to  $65^\circ\text{C}$  followed by addition of appropriate boronic acid and stirred for 8 h. The reaction mixture was extracted with ethyl acetate and distilled water.<sup>2</sup> The pure yellow solid was purified by column chromatography using silica gel (v/v hexane-ethyl acetate).

### **Di(1H-pyrrol-2-yl)methane (4):**

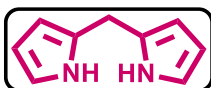

A mixture of paraformaldehyde and freshly distilled pyrrole (35 ml, 504.4 mmol) was taken into a 250 ml RB and degassed with nitrogen for 10 min at RT. The temperature was raised to  $55^\circ\text{C}$  for 10 min under nitrogen atmosphere and  $\text{InCl}_3$  (0.1 g, 0.5 mmol) was added subsequently. The reaction mixture was stirred for 2 h 30 min at the same temperature and then cooled to RT followed by the addition of powdered  $\text{NaOH}$  (0.6 g, 15.2 mmol) to quench the reaction mixture and stirred for further 1 h.<sup>3</sup> The mixture was filtered and the filtrate was concentrated in vacuum. Off white solid was purified by column chromatography using silica gel (v/v hexane-DCM = 1/1). White solid. Yield: 56%.  $^1\text{H}$  NMR (400 MHz,  $\text{CDCl}_3$ ):  $\delta$  (ppm) 7.797 (s, 2H), 6.635 (s, 2H), 6.145 (s, 2H), 6.032 (s, 2H), 3.956 (s, 2H).  $^{13}\text{C}$  NMR ( $\text{CDCl}_3$ , 100 MHz):  $\delta$  (ppm) 117.46, 108.31, 106.56, 26.35. HRMS (ESI)  $m/z$  calcd for  $\text{C}_9\text{H}_{10}\text{N}_2$  146.084, found 145.075.

### General procedure for porphyrin 5:

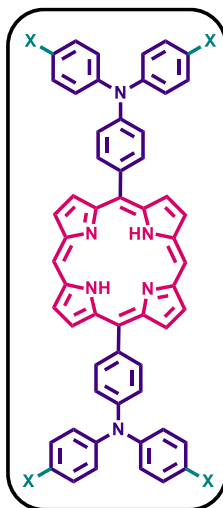

A mixture of compound **3** (1 g, 1.9 mmol) and **4** (0.6 g, 3.8 mmol) was dissolved in  $\text{CH}_2\text{Cl}_2$  (460 ml) solvent, then degassed with nitrogen at RT. Trifluoroacetic acid (53  $\mu\text{l}$ , 0.69 mmol) dissolved in 50 ml DCM was added dropwise and stirred for 7 hr. Further DDQ (0.783 g, 3.45 mmol) was added and stirred for additional 1 hr. Finally the reaction mixture was basified with triethylamine (2 ml) and solvent removed under vacuum.<sup>4</sup> Purple powder was purified by column chromatography (v/v hexane-DCM = 1/1).

### 4-(Bis(4-(thiophen-3-yl)phenyl)amino)benzaldehyde, 3a:

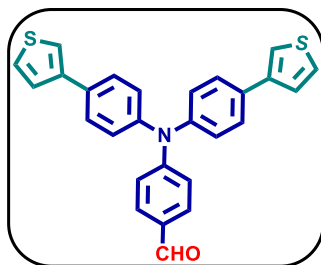

Yellow solid. Yield: 90%.  $^1\text{H}$  NMR (400 MHz,  $\text{CDCl}_3$ ):  $\delta$  (ppm) 9.820 (s, 1H), 7.690 (d,  $J$  = 8.8 Hz, 2H), 7.560 (d,  $J$  = 8.4 Hz, 2H), 7.427-7.320 (m, 6H), 7.208-7.176 (m, 6H), 7.064 (d,  $J$  = 8.8 Hz, 2H).  $^{13}\text{C}$  NMR ( $\text{CDCl}_3$ , 100 MHz):  $\delta$  (ppm) 190.48, 153.20, 146.06, 145.12, 141.12, 141.47, 132.60, 131.36, 129.81, 129.75, 129.29, 127.65, 126.44, 126.35, 126.34, 126.13, 125.23, 125.14, 120.14, 119.65, 119.36. HR-MS (ESI)  $m/z$  calcd for  $\text{C}_{27}\text{H}_{19}\text{NOS}_2[\text{M}+\text{H}]$  437.0908, found 437.0863.

**4-(Di([1,1'-biphenyl]-4-yl)amino)benzaldehyde, 3b:**

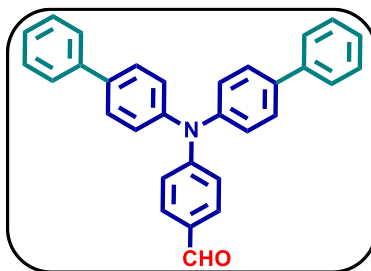

Yellow solid. Yield: 82 %.  $^1\text{H}$  NMR (400 MHz,  $\text{CDCl}_3$ ):  $\delta$  (ppm) 9.842 (s, 1H), 7.731 (d,  $J = 8.8$  Hz, 2H), 7.590 (dd, 8H), 7.44 (t, 4H), 7.36 (t, 2H), 7.27 (d,  $J = 8.4$  Hz, 4H), 7.148 (d,  $J = 8.8$  Hz, 2H).  $^{13}\text{C}$  NMR ( $\text{CDCl}_3$ , 100 MHz):  $\delta$  (ppm) 190.51, 153.12, 145.35, 140.23, 137.87, 131.39, 129.49, 128.88, 128.37, 127.35, 126.88, 126.35, 120.04. HRMS (ESI)  $m/z$  calcd for  $\text{C}_{31}\text{H}_{23}\text{NO}$  [ $\text{M}+\text{H}$ ] 426.1858, found 426.1852.

**4-(Bis(4'-fluoro-[1,1'-biphenyl]-4-yl)amino)benzaldehyde 3c:**

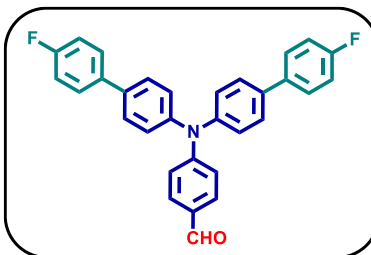

Yellow solid. Yield: 75%.  $^1\text{H}$  NMR (400 MHz,  $\text{CDCl}_3$ ):  $\delta$  (ppm) 9.846 (s, 1H), 7.732 (d,  $J = 8.4$  Hz, 2H), 7.567-7.519 (m, 8H), 7.267 (d,  $J = 1.6$  Hz, 2H), 7.158-7.118 (m, 6H).  $^{13}\text{C}$  NMR ( $\text{CDCl}_3$ , 100 MHz):  $\delta$  (ppm) 190.48, 163.71, 161.26, 153.01, 145.34, 136.89, 136.37, 136.34, 128.24, 126.36, 120.12, 115.88, 115.66. HRMS (ESI)  $m/z$  calcd for  $\text{C}_{33}\text{H}_{21}\text{NOF}_6$  [ $\text{M}+\text{H}$ ] 462.166, found 462.164.

**4-(Bis(4'-methoxy-[1,1'-biphenyl]-4-yl)amino)benzaldehyde 3d:**

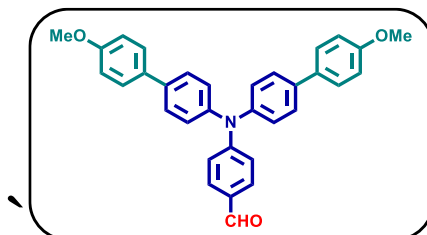

Yellow solid. Yield: 85%.  $^1\text{H}$  NMR (400 MHz,  $\text{CDCl}_3$ ):  $\delta$  (ppm) 9.829 (s, 1H), 7.715 (d,  $J = 8.8$  Hz, 2H), 7.534 (d,  $J = 7.2$  Hz, 8H), 7.246 (d,  $J = 8.4$  Hz, 4H), 7.120 (d,  $J = 8.8$  Hz, 2H), 6.986 (d,  $J = 8.8$  Hz, 4H), 3.861 (s, 6H).  $^{13}\text{C}$  NMR ( $\text{CDCl}_3$ , 100 MHz):  $\delta$  (ppm) 190.48, 159.19, 153.23, 144.73, 137.56, 132.78, 131.38, 129.22, 127.91, 127.87, 126.44, 119.63, 114.30. HRMS (ESI)  $m/z$  calcd for  $\text{C}_{33}\text{H}_{27}\text{NO}_3$  [ $\text{M}+\text{H}$ ] 486.2069, found 486.2072.

**4-(Bis(3'-(trifluoromethyl)-[1,1'-biphenyl]-4-yl)amino)benzaldehyde 3e:**

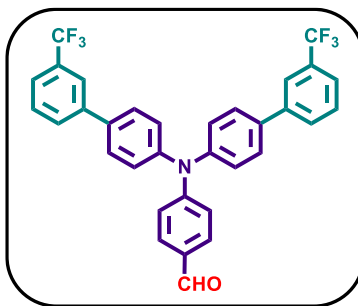

Yellow solid. Yield: 90%.  $^1\text{H}$  NMR (400 MHz,  $\text{CDCl}_3$ ):  $\delta$  (ppm) 9.870 (s, 1H), 7.837 (s, 1H), 7.781-7.747 (m, 4H), 7.623-7.551 (m, 8H), 7.294 (d,  $J$  = 8.8 Hz, 4H), 7.173 (d,  $J$  = 8.4 Hz, 2H).  $^{13}\text{C}$  NMR ( $\text{CDCl}_3$ , 100 MHz):  $\delta$  (ppm) 190.50, 152.77, 146.06, 142.02, 136.30, 135.23, 131.77, 131.45, 131.41, 131.13, 130.81, 130.25, 130.11, 130.05, 129.37, 128.52, 128.22, 127.72, 127.67, 127.61, 126.31, 125.51, 124.02, 123.98, 123.73, 123.69, 123.65, 123.61, 122.80, 120.69, 120.10. HRMS (ESI)  $m/z$  calcd for  $\text{C}_{33}\text{H}_{21}\text{NOF}_6$   $[\text{M}+\text{H}]^+$  562.1606, found 562.157.

**Compound 5a:**

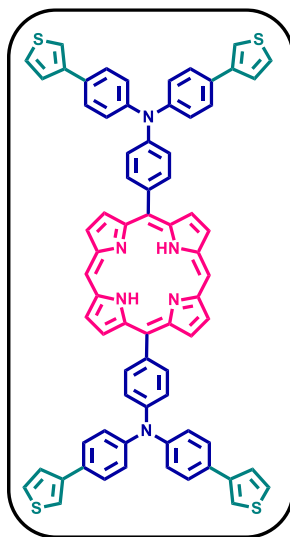

Purple powder. Yield: 22 %.  $^1\text{H}$  NMR (400 MHz,  $\text{CDCl}_3$ ):  $\delta$  (ppm) 10.321 (s, 2H), 9.428 (d,  $J$  = 4.4 Hz, 4H), 9.228 (d,  $J$  = 4.4 Hz, 4H), 8.157 (d,  $J$  = 8.4 Hz, 4H), 7.668 (d,  $J$  = 8.8 Hz, 4H), 7.549 (d,  $J$  = 8.4 Hz, 4H), 7.471-7.413 (m, 20H), 7.202-7.154 (m, 4H).  $^{13}\text{C}$  NMR ( $\text{CDCl}_3$ , 100 MHz):  $\delta$  (ppm) 147.69, 147.39, 146.89, 145.06, 141.94, 135.90, 131.59, 131.03, 130.85, 129.61, 129.55, 127.51, 126.24, 125.08, 124.97, 124.87, 123.55, 121.84, 119.52, 118.97, 105.26. HRMS (ESI)  $m/z$  calcd for  $\text{C}_{84}\text{H}_{52}\text{F}_{12}\text{N}_6$   $[\text{M}+\text{H}]^+$  1125.289, found 1125.287.



### Compound 5b:

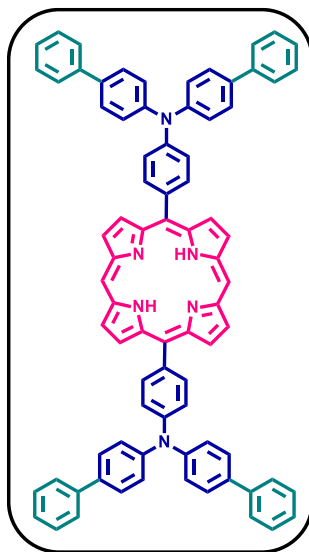

Purple powder. Yield: 30 %.  $^1\text{H}$  NMR (400 MHz,  $\text{CDCl}_3$ ):  $\delta$  (ppm) 10.326 (s, 2H), 9.435 (d,  $J = 3.6$  Hz, 4H), 9.248 (d,  $J = 4$  Hz, 4H), 8.191 (d,  $J = 7.6$  Hz, 4H), 7.689 (d,  $J = 4$  Hz, 16H), 7.619 (d,  $J = 7.6$  Hz, 4H), 7.546 (d,  $J = 8$  Hz, 8H), 7.492 (t,  $J = 7.2$  Hz, 8H), 7.372 (t,  $J = 7.2$  Hz, 4H), -3.003 (s, 2H).  $^{13}\text{C}$  NMR ( $\text{CDCl}_3$ , 100 MHz):  $\delta$  (ppm) 147.39, 147.26, 147.00, 145.07, 140.65, 136.07, 135.96, 131.62, 131.03, 128.84, 128.18, 127.01, 126.81, 124.96, 122.16, 118.92, 105.29. (MALDI-TOF,  $m/z$ ) calcd for  $\text{C}_{80}\text{H}_{56}\text{N}_6$   $[\text{M}+\text{H}]^+$  1101.463, found 1101.621.

### Compound 5c:

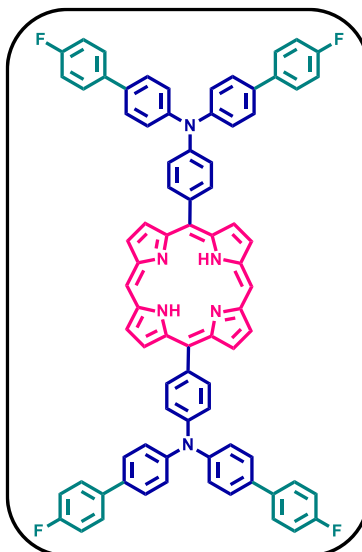

Purple powder. Yield: 22 %.  $^1\text{H}$  NMR (400 MHz,  $\text{CDCl}_3$ ):  $\delta$  (ppm) 10.336 (s, 2H), 9.443 (d,  $J = 3.6$  Hz, 4H), 9.244 (d,  $J = 3.6$  Hz, 4H), 8.195 (d,  $J = 8$  Hz, 4H), 7.636 (m,  $J = 8.4$  Hz, 20H), 7.531 (d,  $J = 8$  Hz, 8H), 7.180 (t,  $J = 8.8$  Hz, 8H), -3.009 (s, 2H).  $^{13}\text{C}$  NMR ( $\text{CDCl}_3$ , 100 MHz):  $\delta$  (ppm) 162.45, 160.00, 146.31, 146.15, 145.87, 143.98, 135.72, 135.69, 134.93, 134.47, 134.06, 130.68, 130.01, 127.31, 127.23,

127.01, 123.97, 121.11, 117.84, 114.75, 114.54, 104.30. (MALDI-TOF,  $m/z$ ) calcd for  $C_{80}H_{52}F_4N_6$   $[M+H]^+$  1173.426, found 1173.554.

**Compound 5d:**

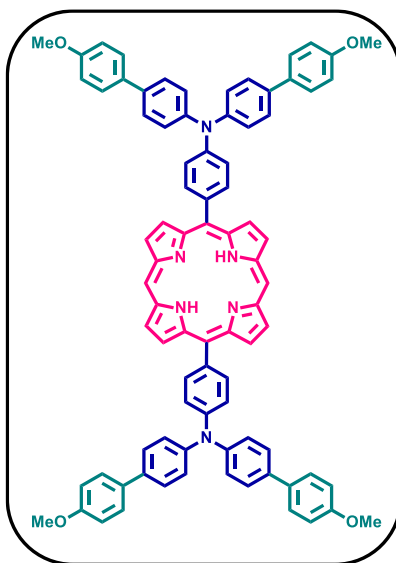

Purple powder. Yield: 46 %.  $^1H$  NMR (400 MHz,  $CDCl_3$ ):  $\delta$  (ppm) 10.323 (s, 2H), 9.434 (d,  $J = 4$  Hz, 4H), 9.249 (d,  $J = 4$  Hz, 4H), 8.176 (d,  $J = 8$  Hz, 4H), 7.652-7.605 (m, 20H), 7.518 (d,  $J = 8$  Hz, 8H), 7.019 (d,  $J = 8.4$  Hz, 8H), 3.878 (s, 12H), -3.000 (s, 2H).  $^{13}C$  NMR ( $CDCl_3$ , 100 MHz):  $\delta$  (ppm) 158.97, 147.45, 146.49, 145.07, 135.95, 135.79, 135.24, 133.28, 131.61, 131.06, 127.84, 127.73, 125.11, 121.84, 119.01, 114.29, 105.28, 55.39. MALDI-TOF,  $m/z$  calcd for  $C_{84}H_{64}N_6O_4$   $[M+H]^+$  1221.506, found 1221.682.

**Compound 5e:**

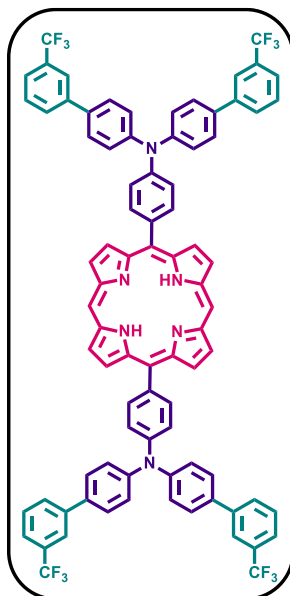

Purple powder. Yield: 18 %. <sup>1</sup>H NMR (400 MHz, CDCl<sub>3</sub>): δ (ppm) 10.351 (s, 2H), 9.457 (d, *J* = 4 Hz, 4H), 9.245 (d, *J* = 4 Hz, 4H), 8.226 (d, *J* = 8 Hz, 4H), 7.930 (s, 4H), 7.860 (d, *J* = 4.8 Hz, 4H), 7.708 (d, *J* = 7.6 Hz, 8H), 7.643-7.561 (m, 20H), -3.004 (s, 2H). <sup>13</sup>C NMR (CDCl<sub>3</sub>, 100 MHz): δ (ppm) 147.59, 146.95, 131.72, 131.00, 130.02, 129.33, 128.35, 124.92, 123.62, 122.90, 118.75, 105.38. (MALDI-TOF, *m/z*) calcd for C<sub>84</sub>H<sub>52</sub>F<sub>12</sub>N<sub>6</sub> [M+H]<sup>+</sup> 1373.413, found 1373.606.

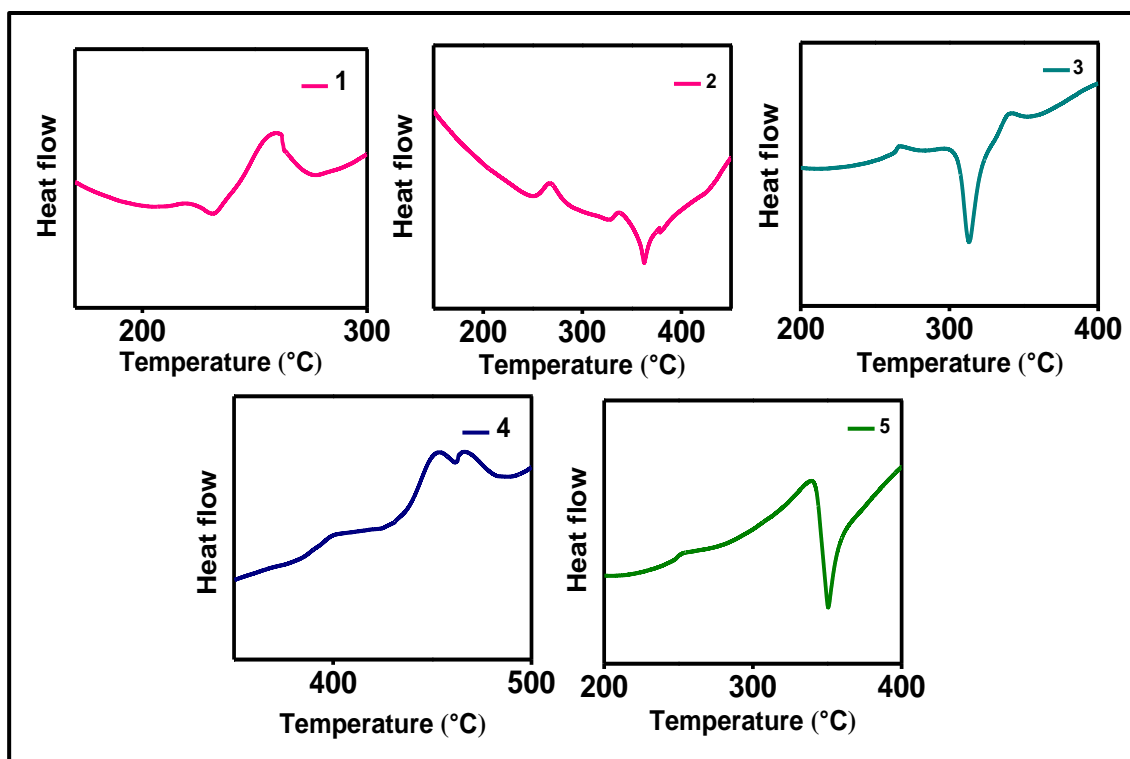

**Figure S1.** DSC Thermogram of compounds **5a-e**.

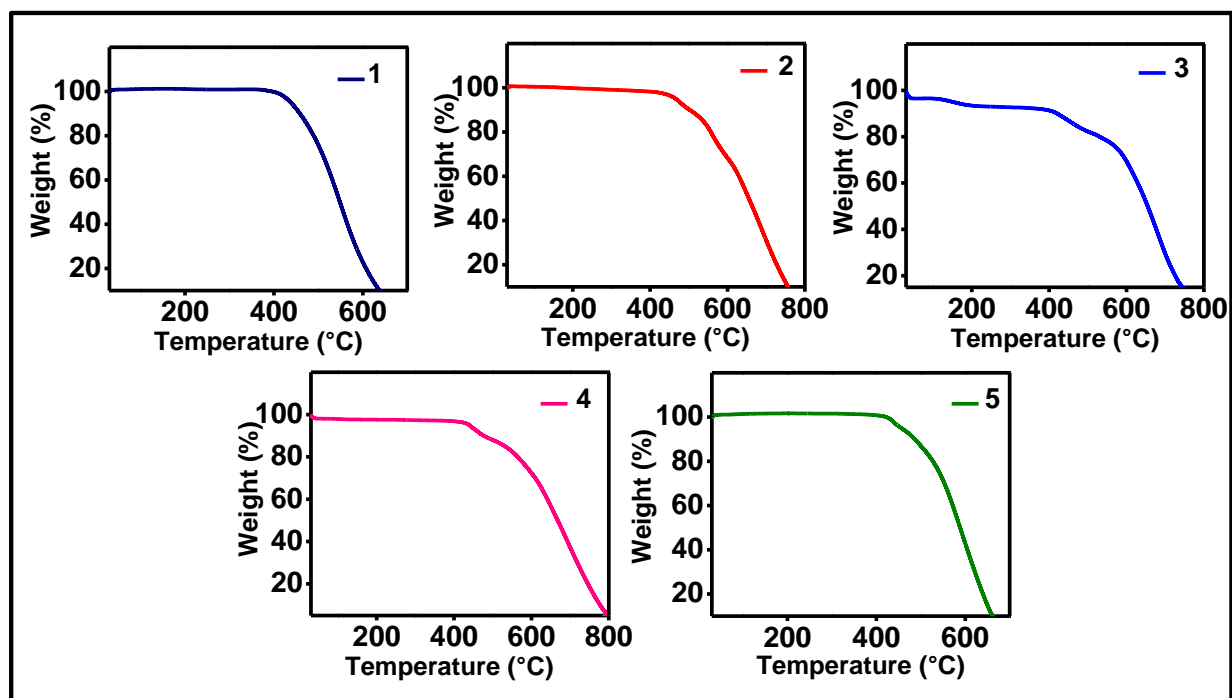

**Figure S2.** TGA Thermogram of compounds **5a-e**.

**Table S1.** Melting point and decomposition temperature for 10 % weight loss of compounds

| C. No. | T <sub>m</sub> (°C) | T <sub>d</sub> (°C) |
|--------|---------------------|---------------------|
| 5a     | 396                 | 461                 |
| 5b     | 363                 | 504                 |
| 5c     | 313                 | 422                 |
| 5d     | 461                 | 479                 |
| 5e     | 351                 | 489                 |

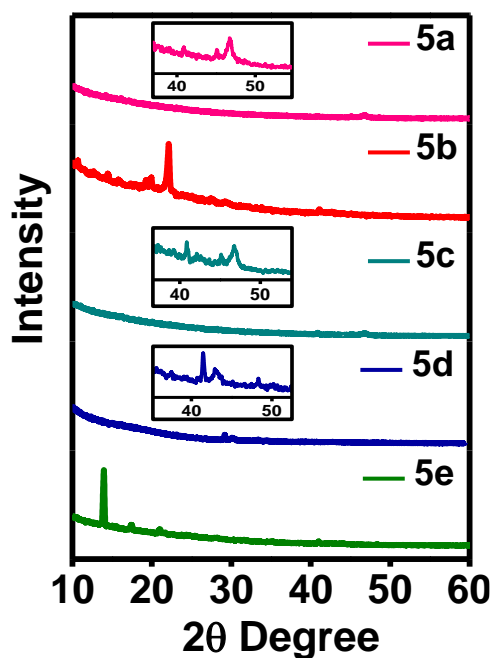

**Figure S3.** GIXRD of compounds **5a-e**

### Computational studies:

DFT and TD-DFT calculations were carried out for compounds **5a-e** to gain an insight into their electronic structures. Porphyrin molecules with different TAA were explored theoretically to observe their electronic and charge transport properties. DFT: B3LYP *ab initio* approach was employed to elucidate the structural properties of all molecules. The optimization of all compounds were done starting from MOPAC and ending with Gaussian at the DFT-B3LYP (6-31g\*) level of theory for ground state

(S<sub>0</sub>). From the TD-DFT calculations, the oscillator strength value (F) obtained demonstrated all the compounds have S<sub>0</sub>-S<sub>1</sub>, S<sub>3</sub>-T<sub>1</sub> and S<sub>3</sub>-T<sub>2</sub> transitions. The reorganization energies i.e., energy relaxation during transport was obtained from the changes in bond length acquired from a few important centers. To clarify the impact of substituent on the optical properties substituted porphyrins, the electronic transitions at the optimized structures also have been calculated by time-dependent DFT (TD-DFT) calculations. The maximum absorption wavelengths, oscillator strength (f) and corresponding transition assignment are listed in **Table S2**. The geometrical parameters suggested that all compounds in which substituted TAA groups were exhibited non-planar whereas porphyrin core moiety obtained as planar. From medeA data, the carrier mobilities of all the compounds revealed in the range of 10<sup>-6</sup> m<sup>2</sup> V<sup>-1</sup>s<sup>-1</sup>. The values are given in the **Table S2**. Compound **5e** achieved up to the value of 8.6046x10<sup>-6</sup>, the highest among the series. It might be due to the presence of electron withdrawing group.

**Table S2.** Electronic absorption behavior of compounds **5a-e** by TD-DFT.

| C. No.    | Electronic Transition | Wavelength nm | Energy eV                          | Oscillator strength (f) | Type of transition             | Hole Transport (m <sup>2</sup> /Vs) 300K |
|-----------|-----------------------|---------------|------------------------------------|-------------------------|--------------------------------|------------------------------------------|
| <b>5a</b> | Ex3=290-295           | 604.16        | 2.052<br>(16550cm <sup>-1</sup> )  | 0.000                   | S <sub>3</sub> -T <sub>2</sub> | 2.8099x10 <sup>-6</sup>                  |
| <b>5b</b> | Ex3=286-290           | 623.5         | 1.988<br>(160343cm <sup>-1</sup> ) | 0.000                   | S <sub>3</sub> -T <sub>1</sub> | 6.7825x10 <sup>-6</sup>                  |
| <b>5c</b> | Ex3=302-307           | 603.0         | 2.056<br>(16582cm <sup>-1</sup> )  | 0.000                   | S <sub>3</sub> -T <sub>2</sub> | 5.7527x10 <sup>-6</sup>                  |
| <b>5d</b> | Ex3=353-354           | 608.5         | 2.037<br>(16429cm <sup>-1</sup> )  | 0.513 (52%)             | S <sub>0</sub> -S <sub>1</sub> | 8.6046x10 <sup>-6</sup>                  |
| <b>5e</b> | Ex3=321-322           | 619.1         | 2.002<br>(16147cm <sup>-1</sup> )  | 0.581 (67%)             | S <sub>0</sub> -S <sub>1</sub> | 3.2984x10 <sup>-6</sup>                  |

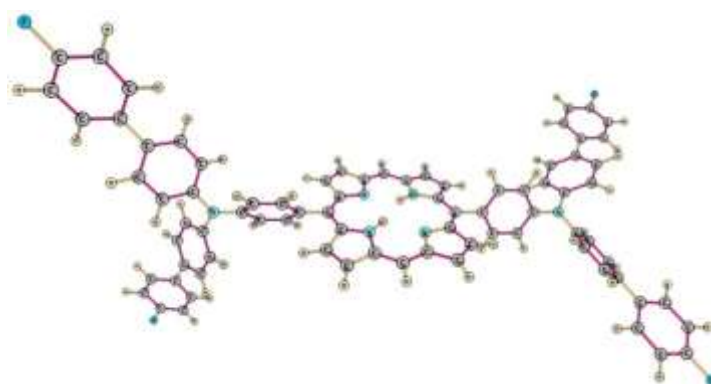

**Figure S4.** Generalized representation of the molecule

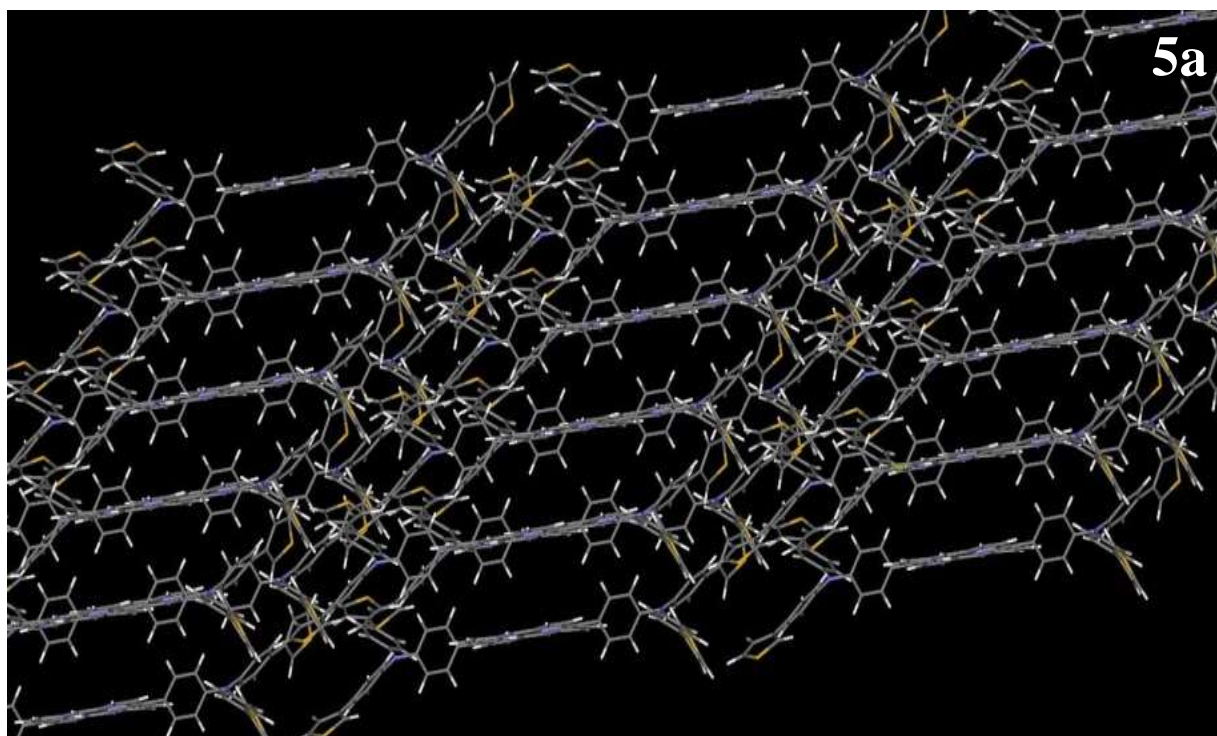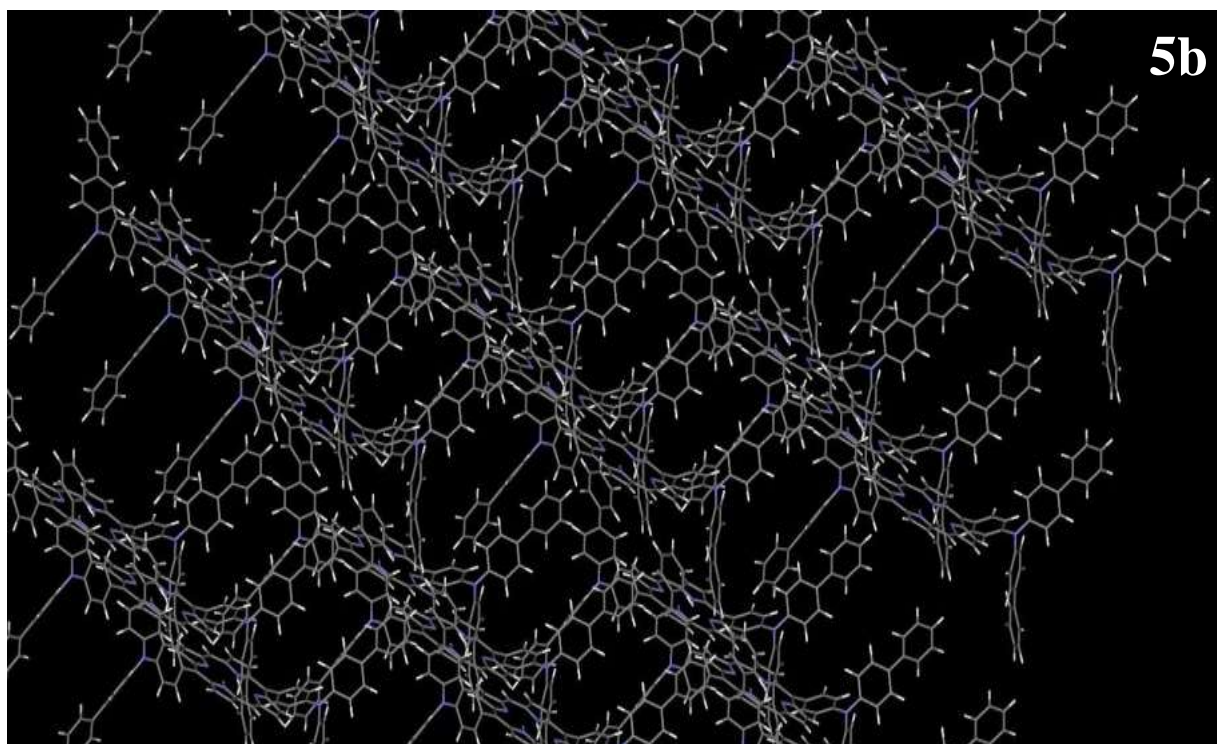



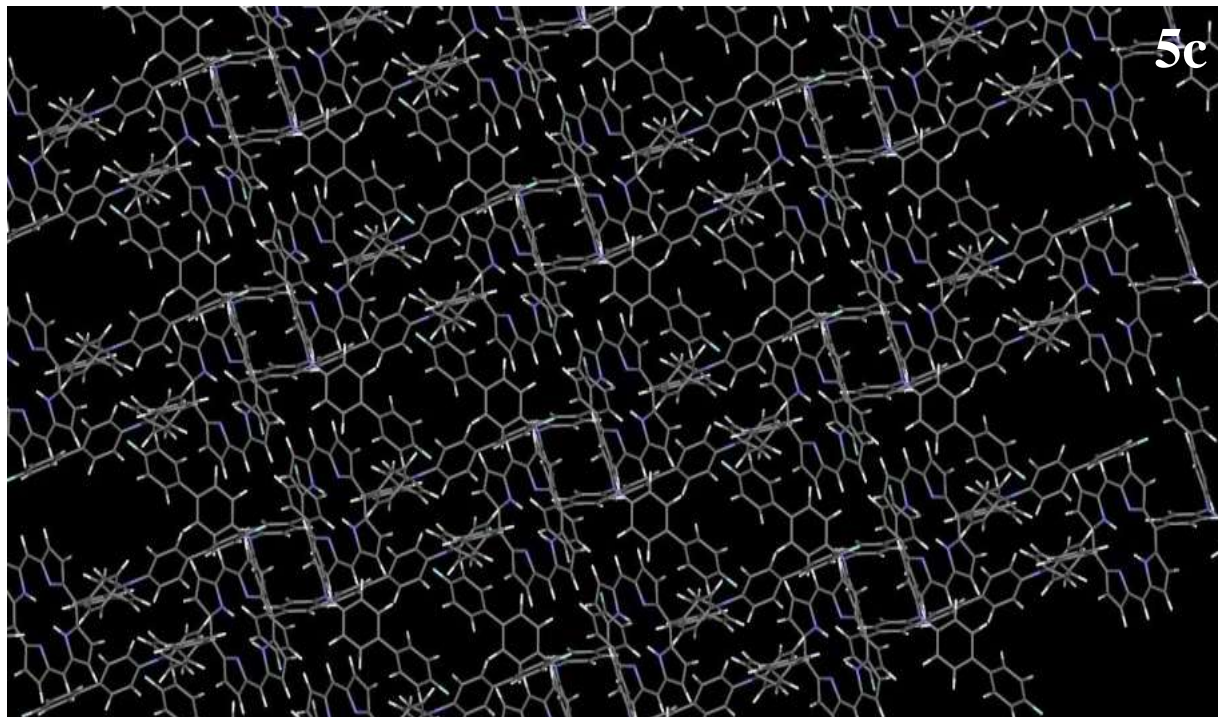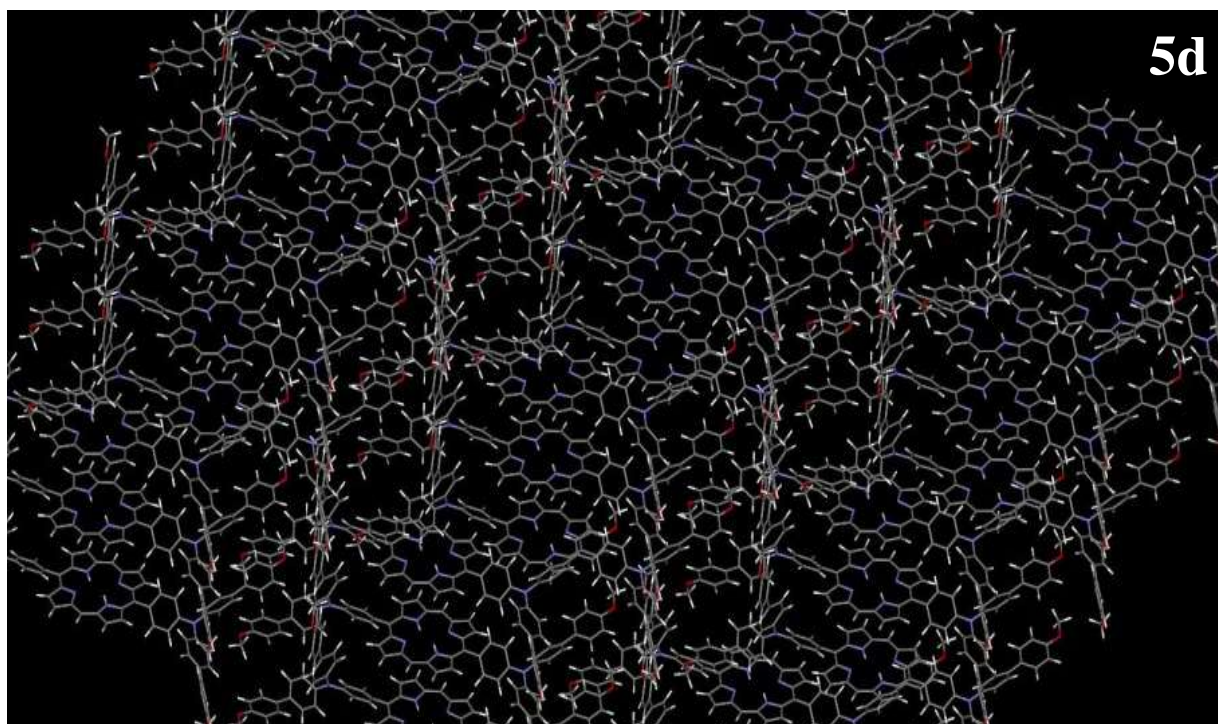



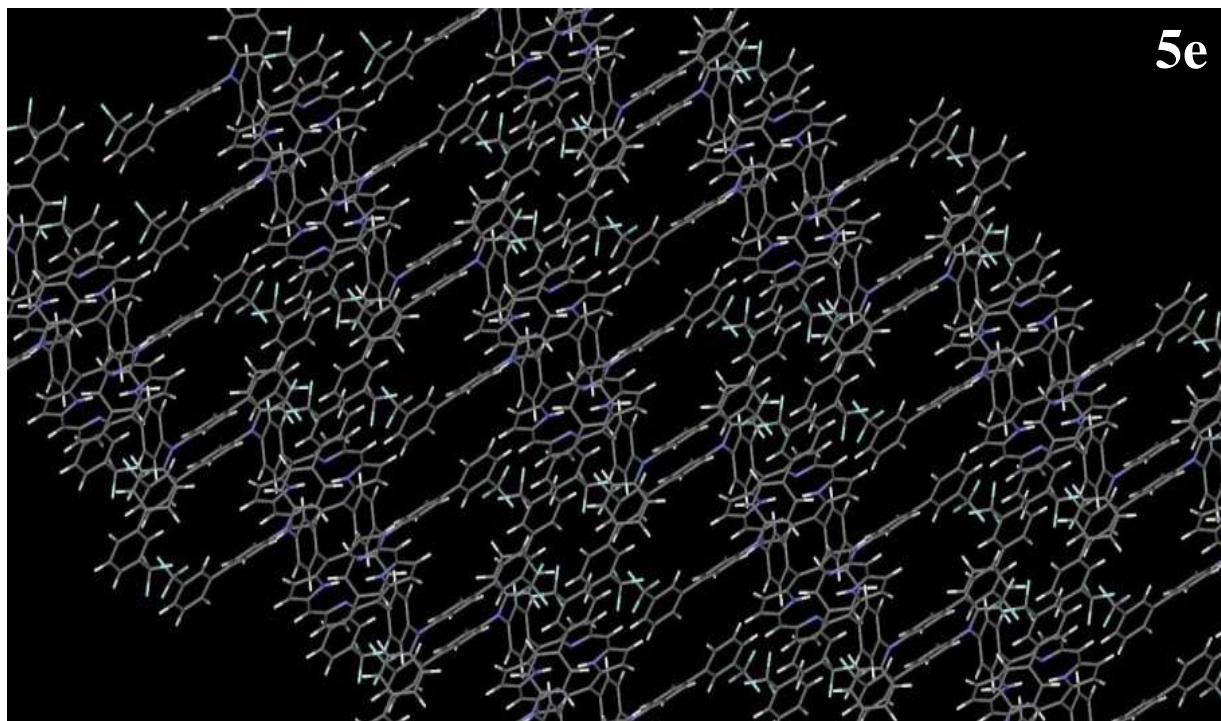

**Figure S5.** Molecular packing of compounds **5a-e**.

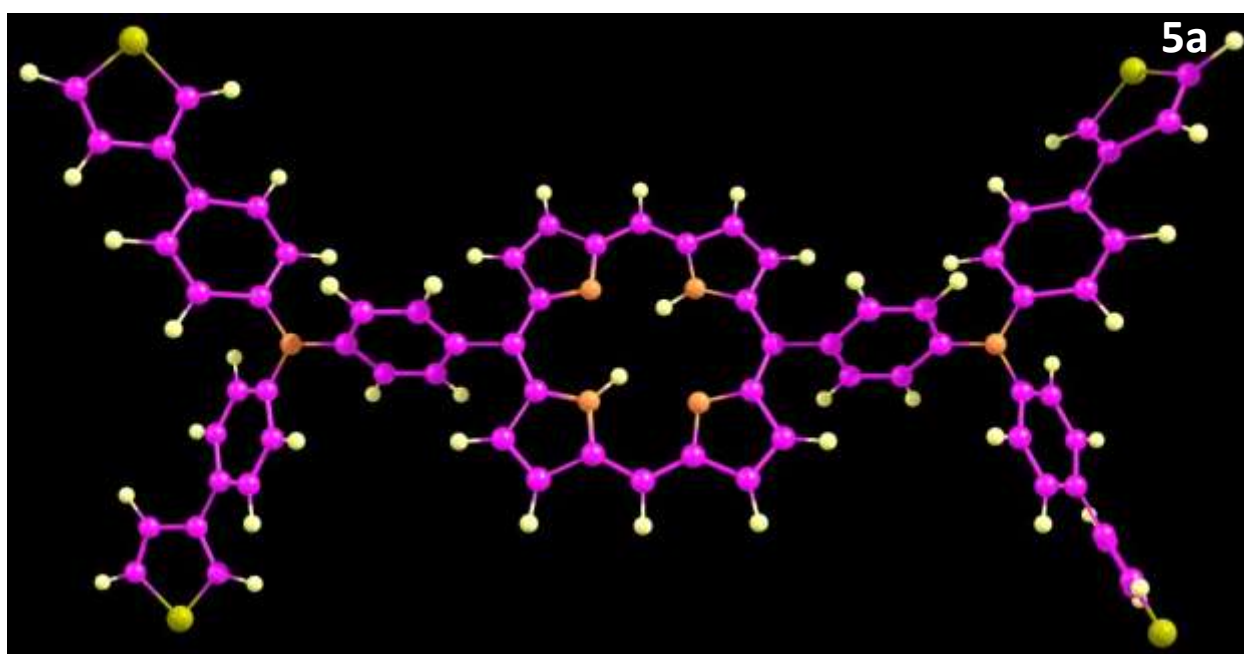

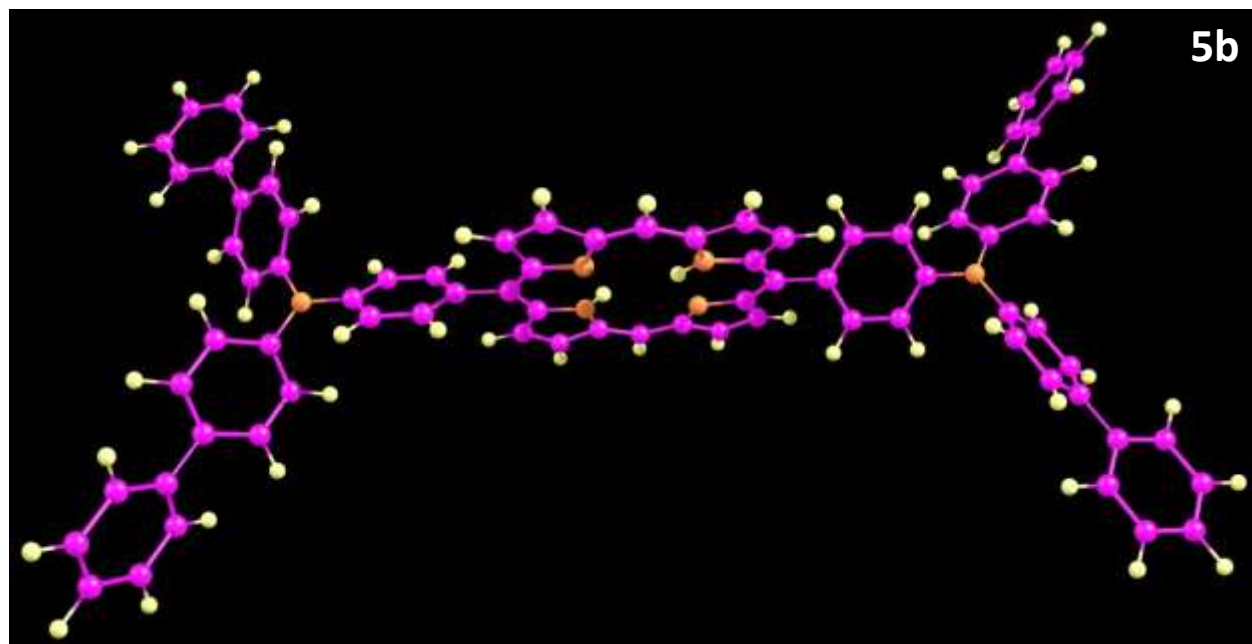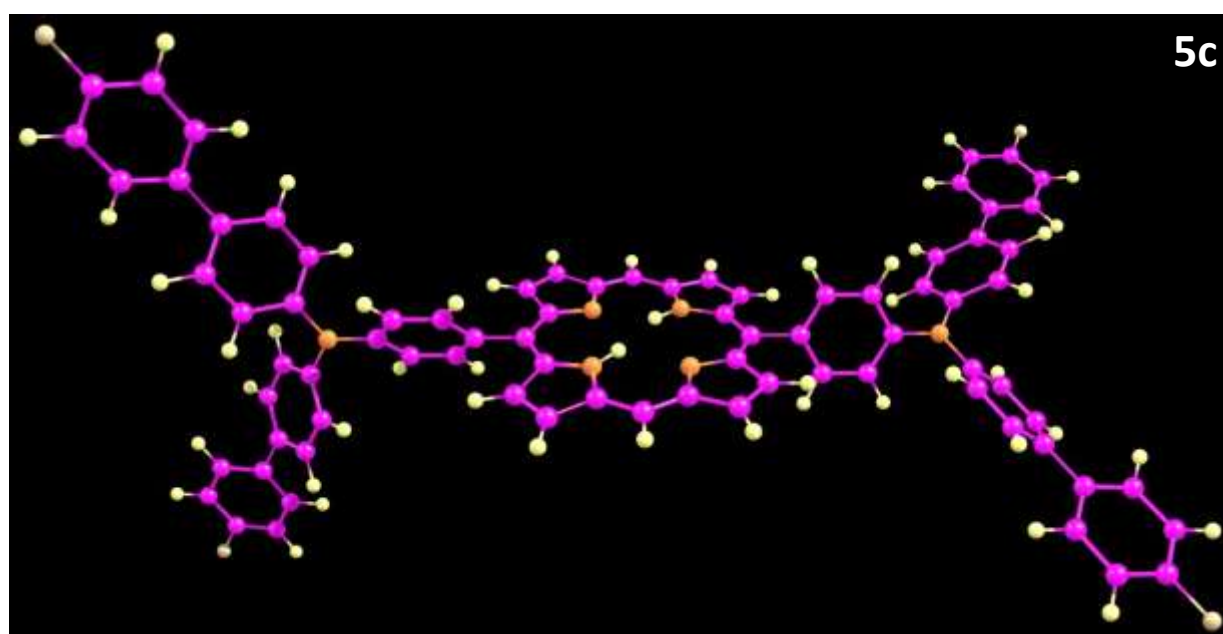

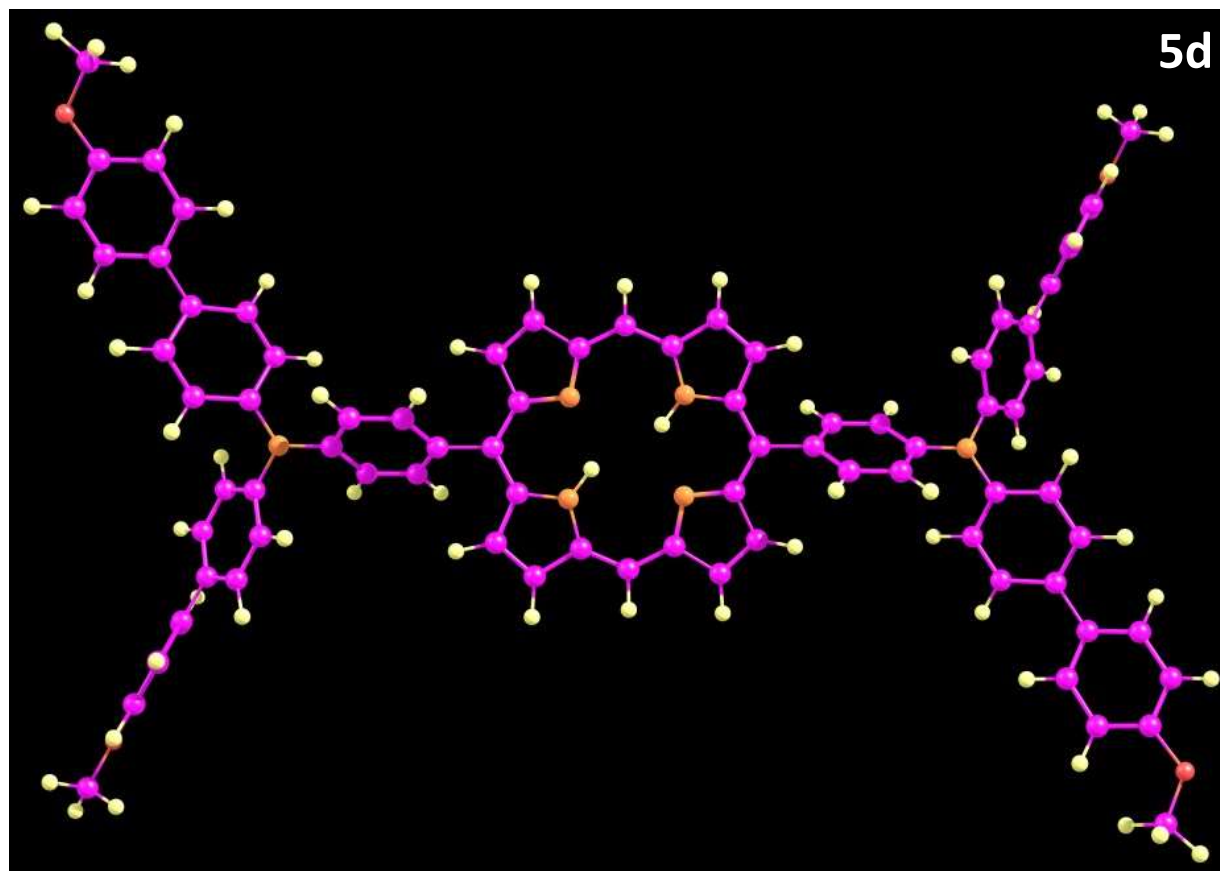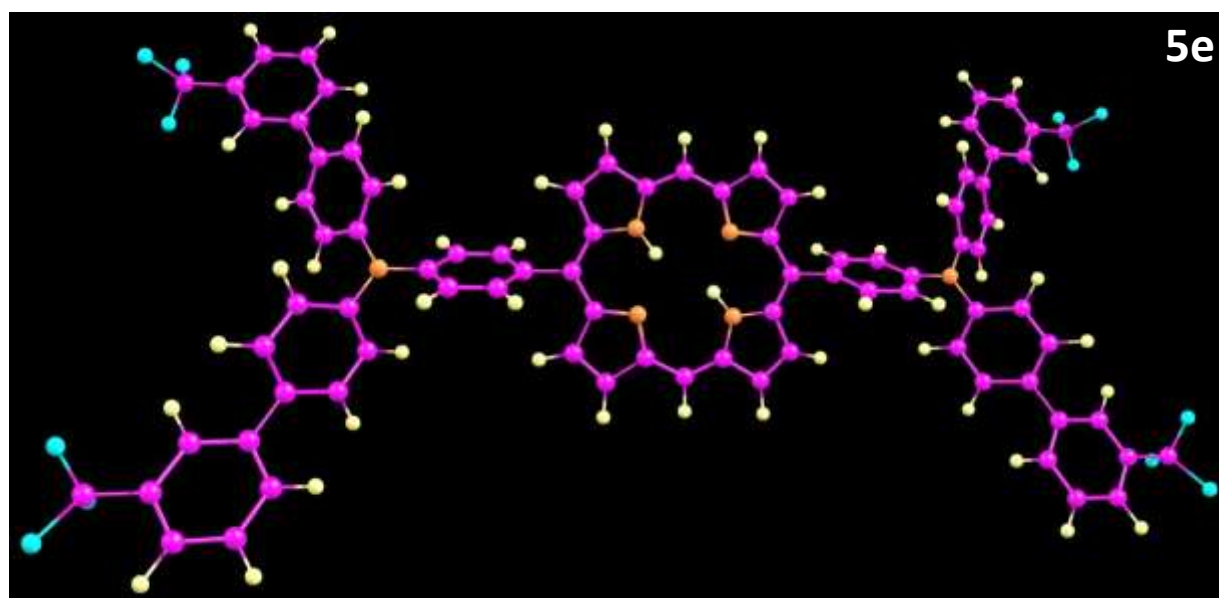

**Figure S6.**Optimized geometry of compounds **5a-e**.

**Table S3.** Grain size of compounds **5a-e**

| C. No.    | Grain size( $\mu\text{m}$ ) |
|-----------|-----------------------------|
| <b>5a</b> | 1.83                        |
| <b>5b</b> | 0.51                        |
| <b>5c</b> | 5.13                        |
| <b>5d</b> | 3.02                        |
| <b>5e</b> | 8.10                        |

**Table S4.** d-spacing of compounds **5a-e**

| C. No.    | d-spacing(nm) |
|-----------|---------------|
| <b>5a</b> | 1.944         |
| <b>5b</b> | 4.041         |
| <b>5c</b> | 1.946         |
| <b>5d</b> | 2.178         |
| <b>5e</b> | 6.363         |

**Device fabrication**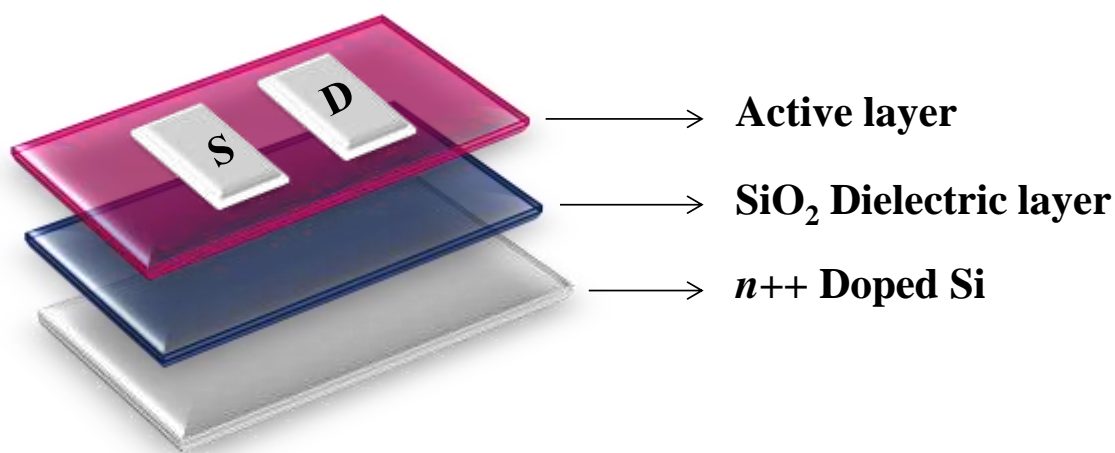**Figure S7.** Schematic representation of the OFET device

Field-effect mobility of porphyrins was measured by employing bottom gate top contact architecture for device fabrication represented as in the Figure S6. The heavily doped  $n^{++}$  Si substrate treated as the gate electrode and thermally grown  $\text{SiO}_2$  (300 nm) acts as a gate

dielectric. Active semiconducting material coated over SiO<sub>2</sub> by spin coating method using chloroform and annealed at 100 °C for one hour to obtain uniform film and also to remove the residual solvents. Silver electrodes were made over active layer as source and drain electrode with a channel length of 150 µm and a width of 5 mm was used and again annealed as earlier. The fabricated device showed *p*-type behavior for all the compounds.

### Reliability factor and effective mobility calculation

The reliability factor was calculated for all the compounds which define the ratio of the maximum channel conductivity experimentally achieved in a FET at the maximum gate voltage to the maximum channel conductivity expected in a correctly functioning ideal FET. In the saturation regime, the reliability factor is calculated using the equation 1.

$$r_{\text{sat}} = \left( \frac{\sqrt{|I_{\text{SD}}|^{\text{max}}} - \sqrt{|I_{\text{SD}}|^0}}{|V_{\text{GS}}|^{\text{max}}} \right)^2 \bigg/ \left( \frac{WC_i}{2L} \mu_{\text{sat}} \right)_{\text{claimed}}$$

$$= \left( \frac{\sqrt{|I_{\text{SD}}|^{\text{max}}} - \sqrt{|I_{\text{SD}}|^0}}{|V_{\text{GS}}|^{\text{max}}} \right)^2 \bigg/ \left( \frac{\partial \sqrt{|I_{\text{SD}}|}}{\partial |V_{\text{GS}}|} \right)_{\text{claimed}}^2 \quad (1)$$

whereas,  $\mu_{\text{sat}}$  is the calculated mobility, L, W and C<sub>i</sub> are the device parameters, and  $|I_{\text{SD}}|^{\text{max}}$  denotes the experimental maximum source–drain current reached at the maximum gate voltage  $|V_{\text{GS}}|^{\text{max}}$  and  $|I_{\text{SD}}|^0$  represents the source–drain current at  $V_{\text{GS}} = 0$ .

By using the calculated reliability factor and claim mobility the effective mobility is measured from equation 2.

$$\mu_{\text{eff}} = r \times \mu_{\text{claimed}} \quad (2)$$

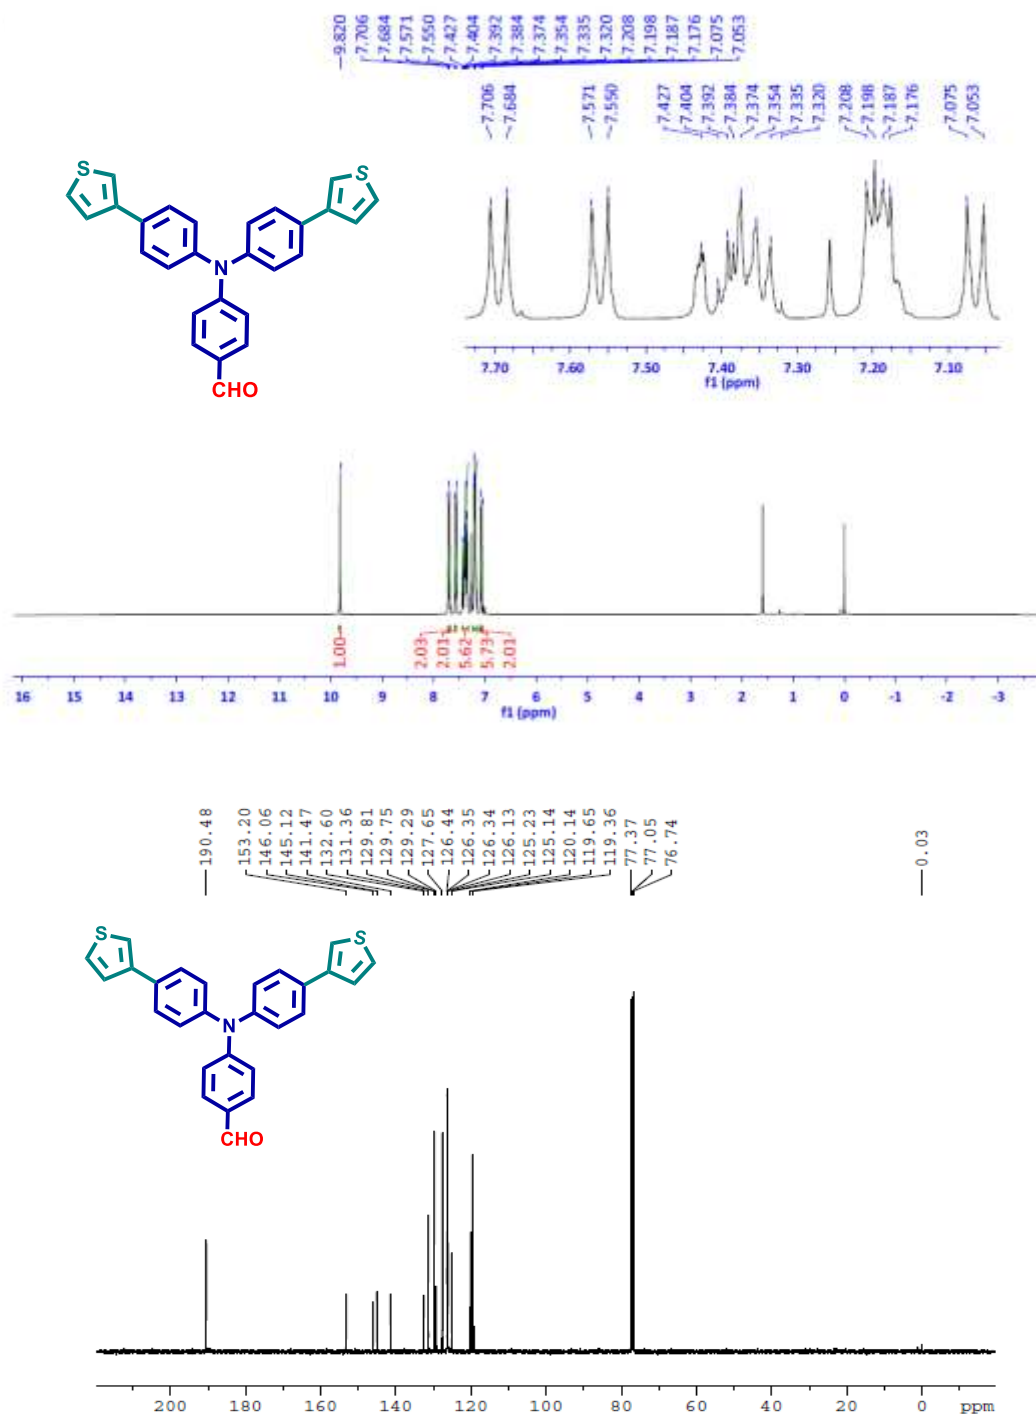

**Figure S8.** <sup>1</sup>H NMR and <sup>13</sup>C NMR spectra of compound 3a.

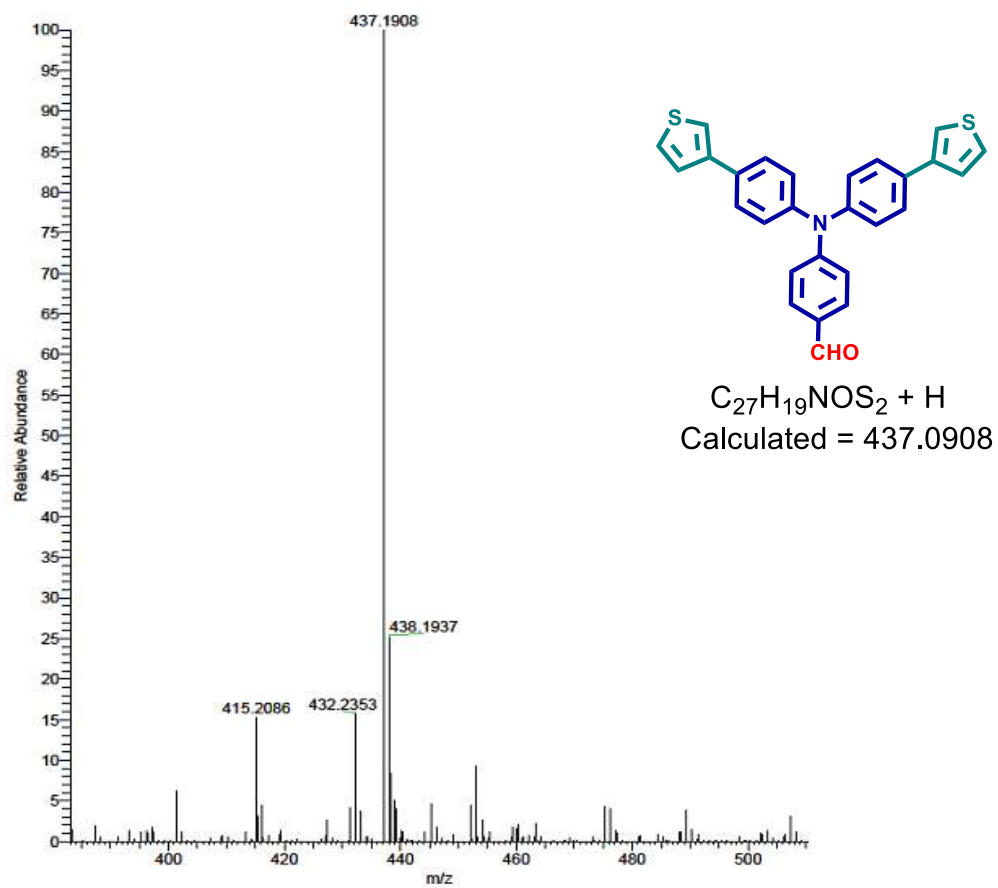

**Figure S9.** HR-Mass spectrum of **3a**.



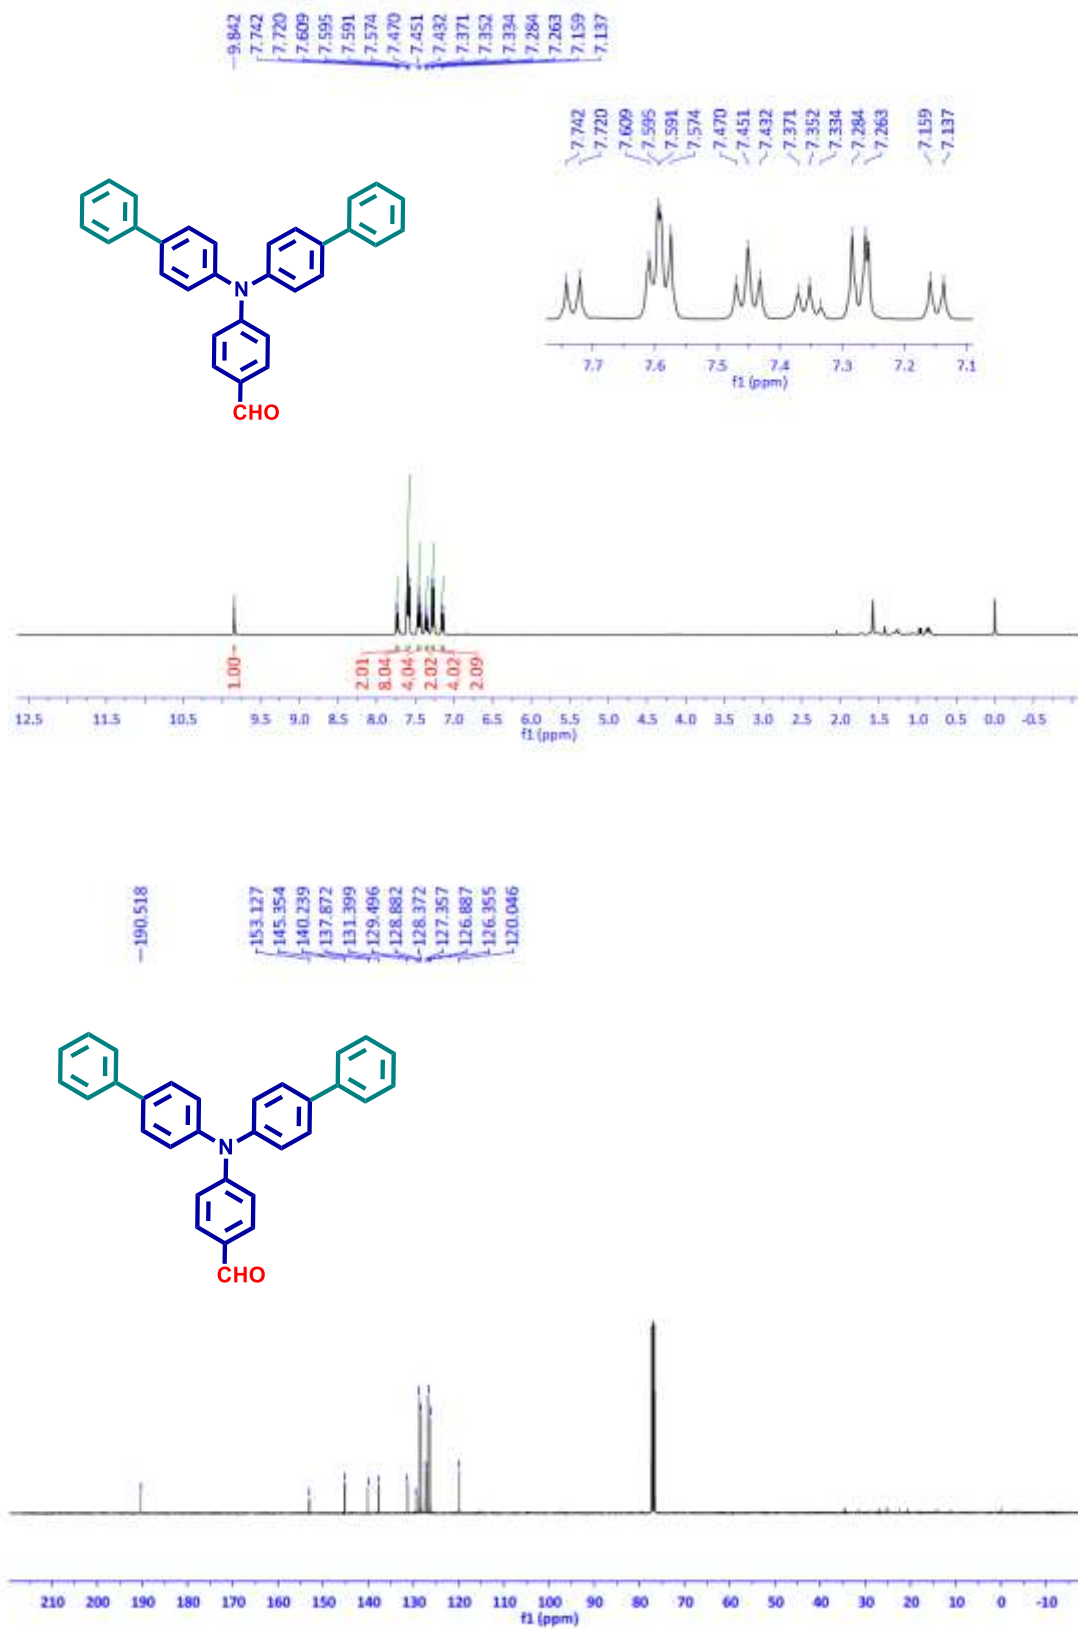

**Figure S10.**  $^1\text{H}$  NMR and  $^{13}\text{C}$  NMR spectra of **3b**.



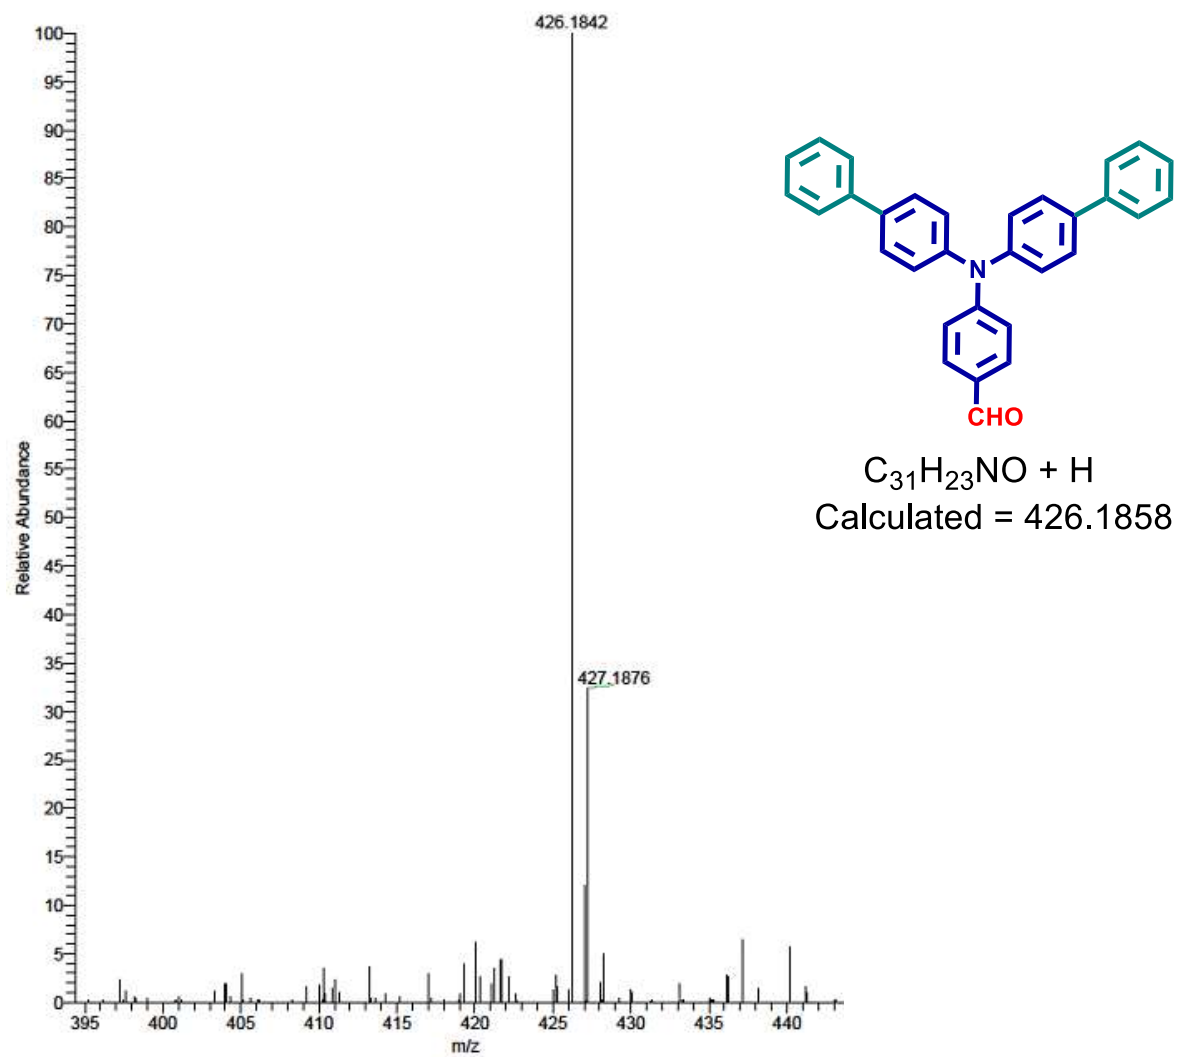

**Figure S11.** HR-MS spectrum of **3b**.

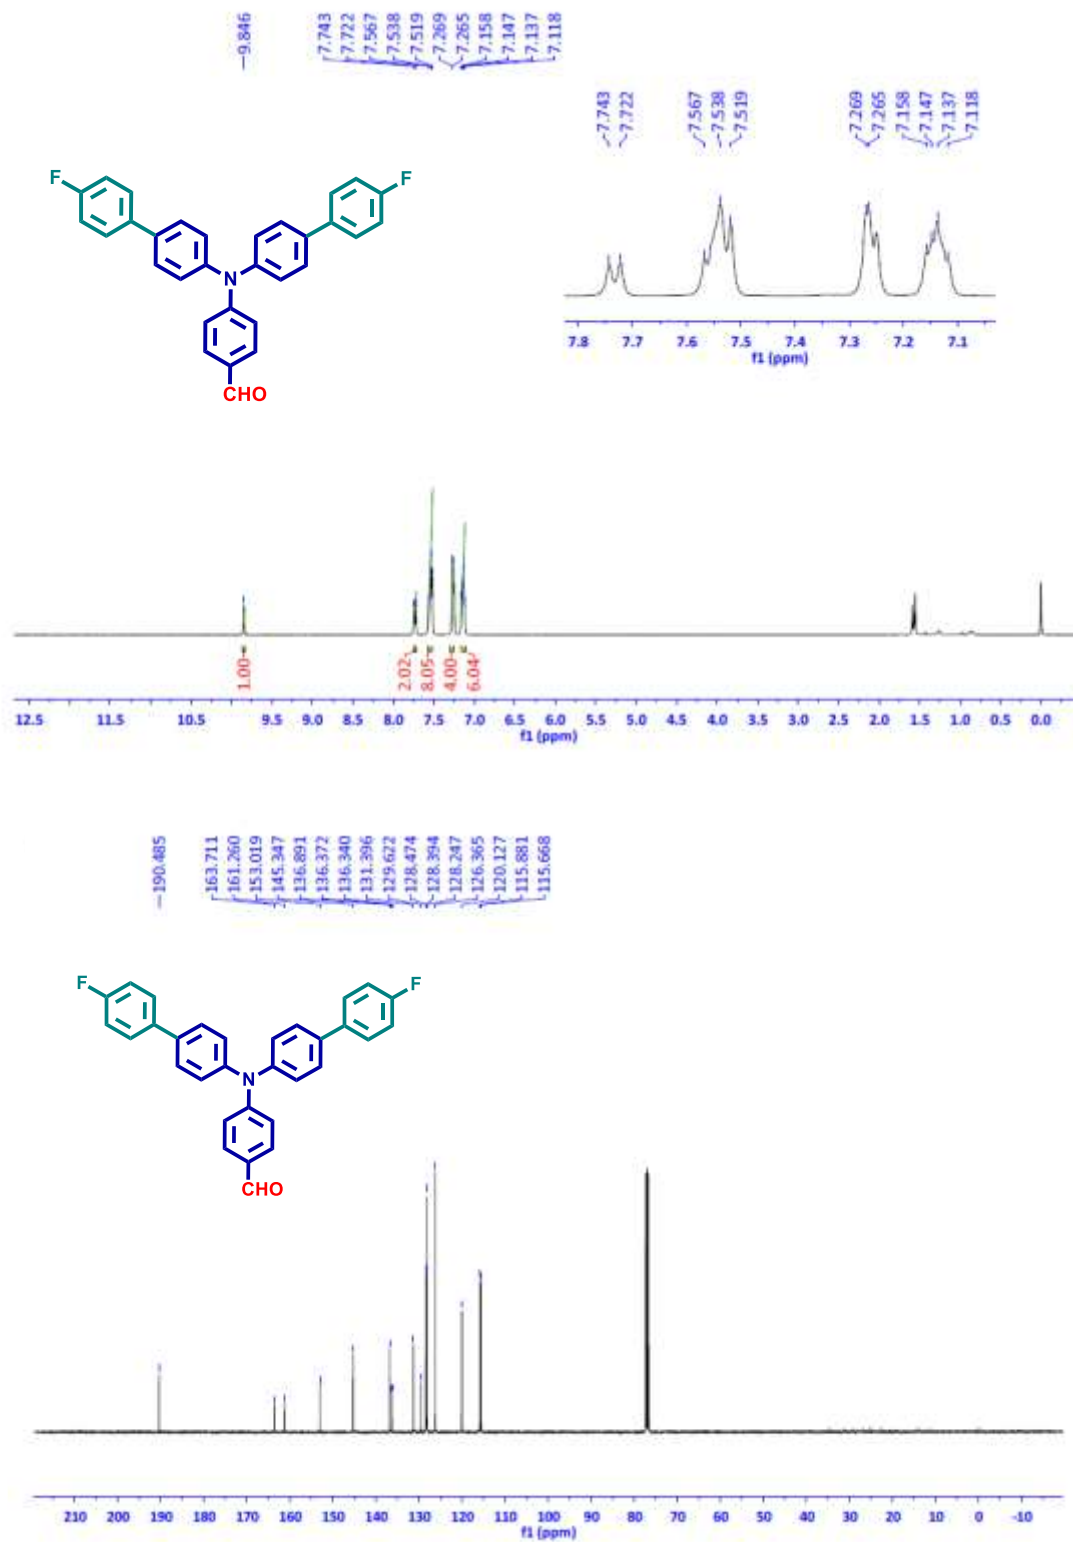

**Figure S12.**  $^1\text{H}$  NMR and  $^{13}\text{C}$  NMR spectra of **3c**.

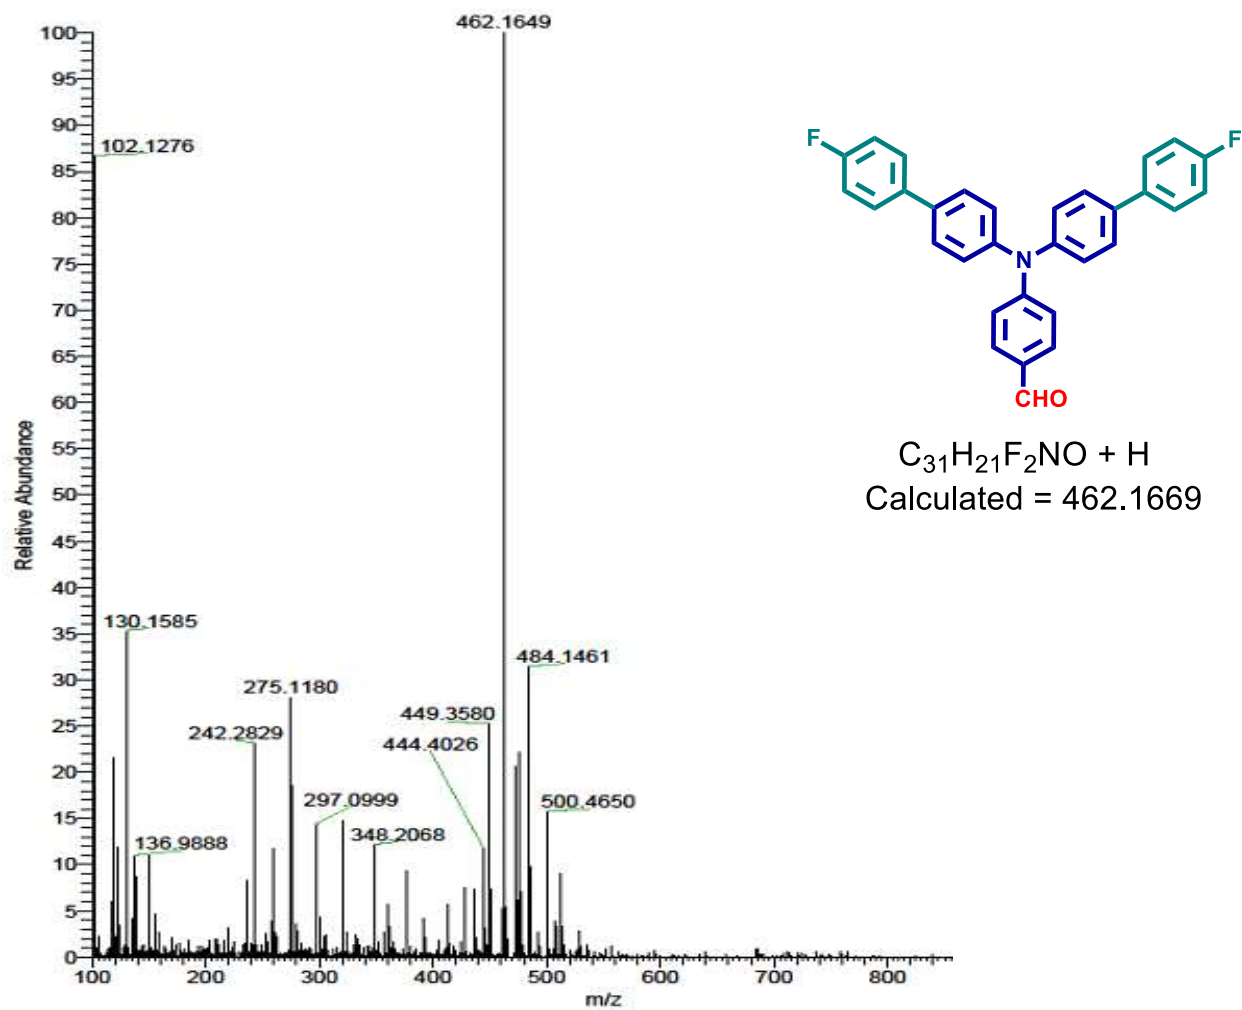

Figure S13. HR-Mass spectrum of 3c.

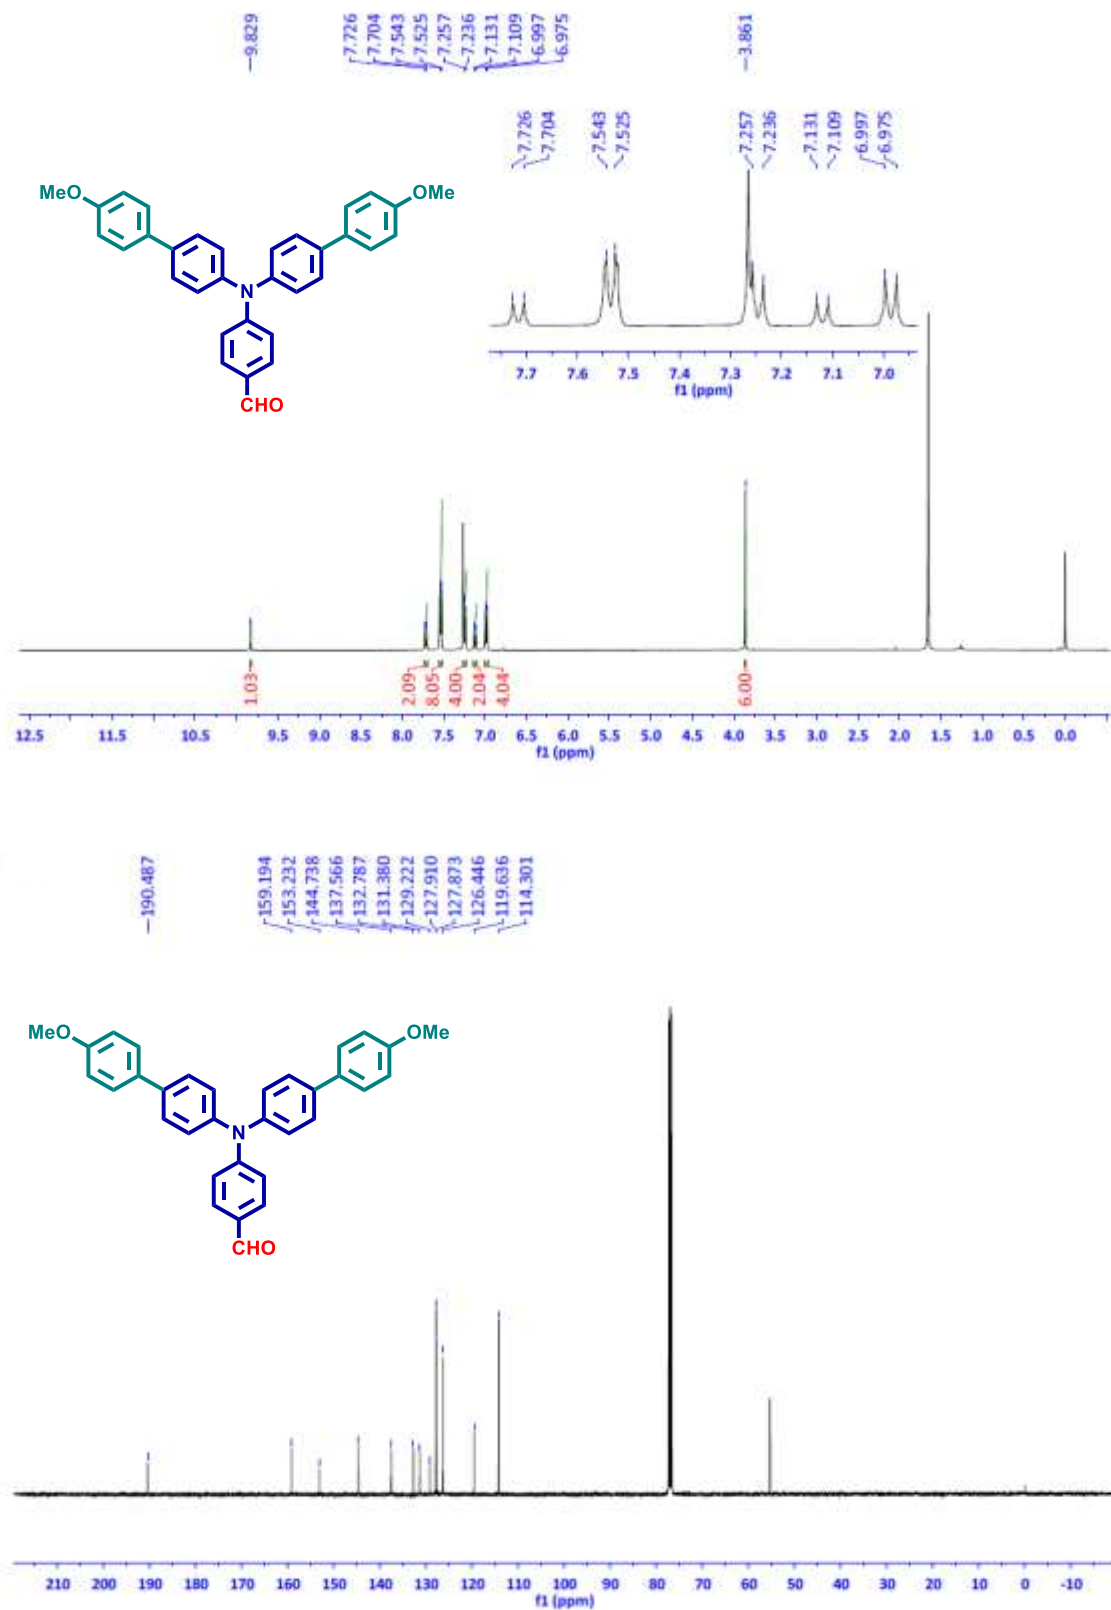

**Figure S14.** <sup>1</sup>H NMR and <sup>13</sup>C NMR spectra of **3d**.

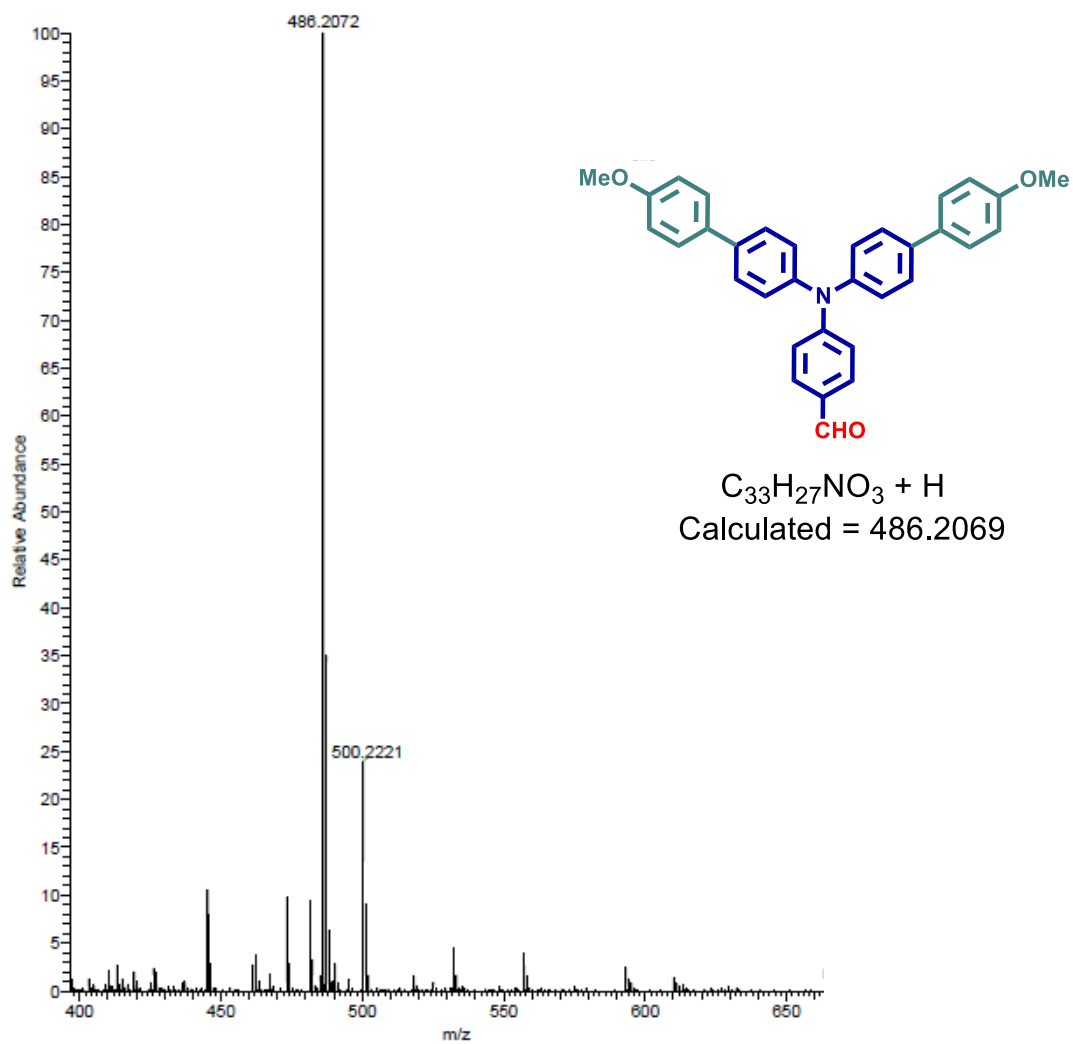

**Figure S15.** HR-Mass spectrum of **3d**.

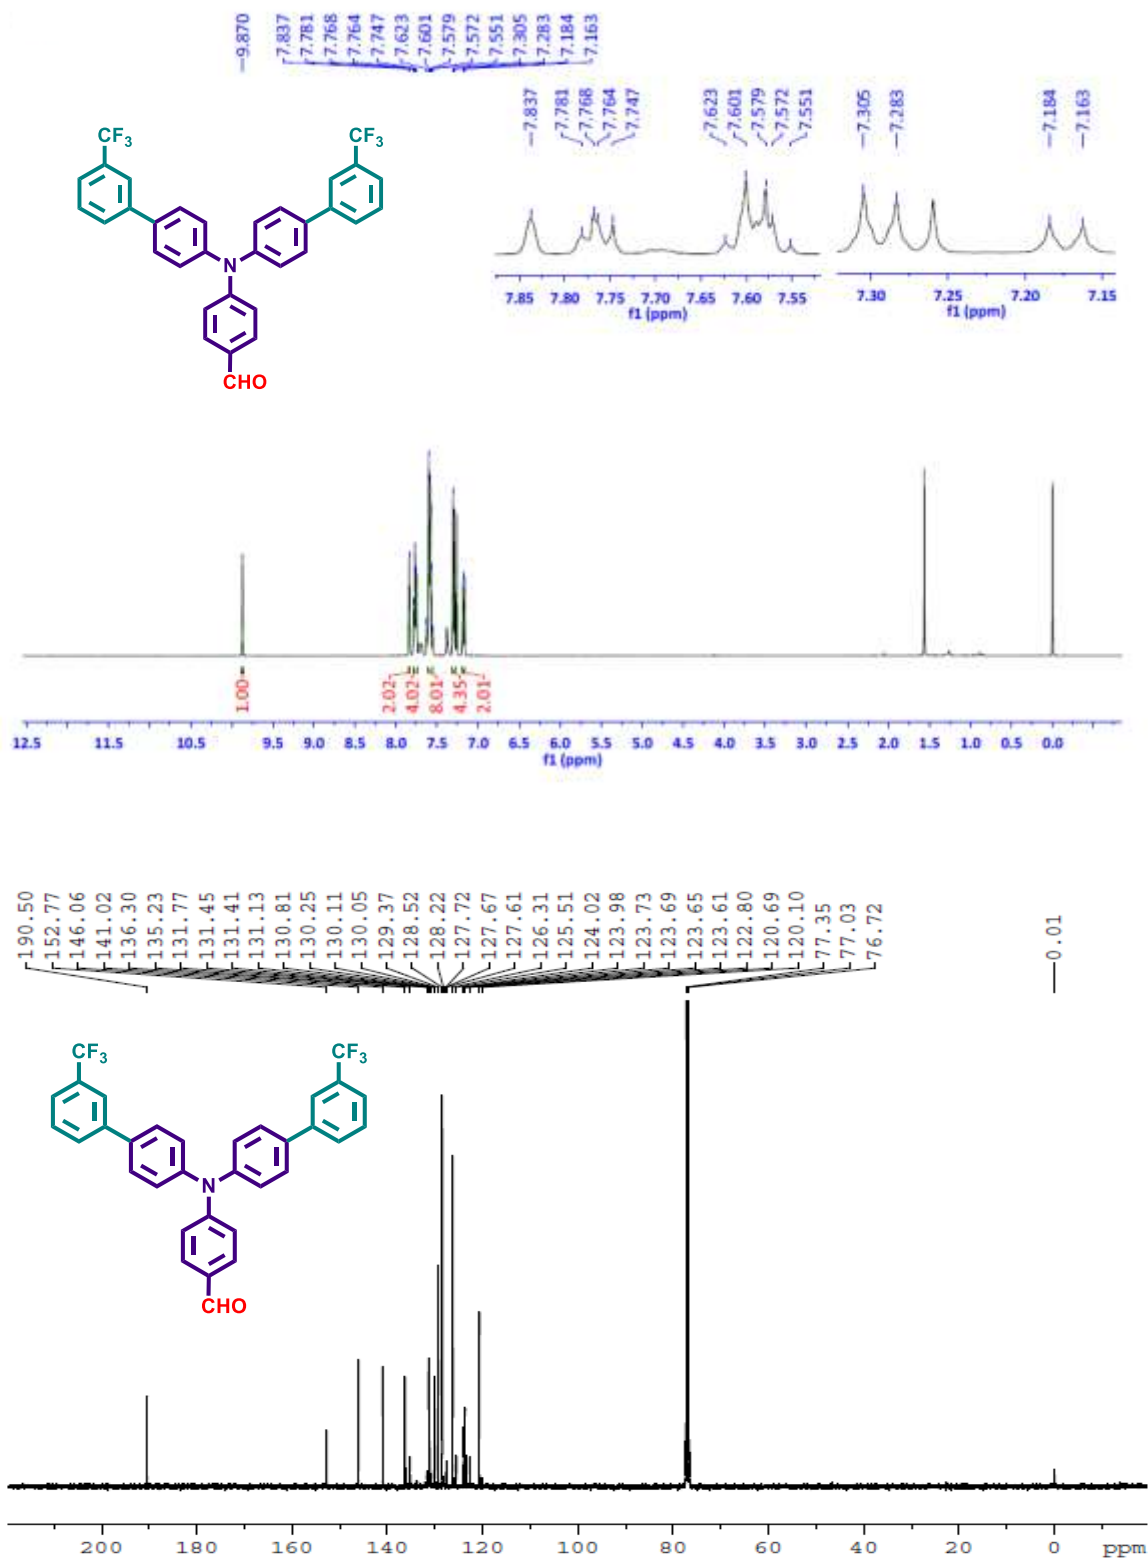

Figure S16. <sup>1</sup>H NMR and <sup>13</sup>C NMR spectra of **3e**.

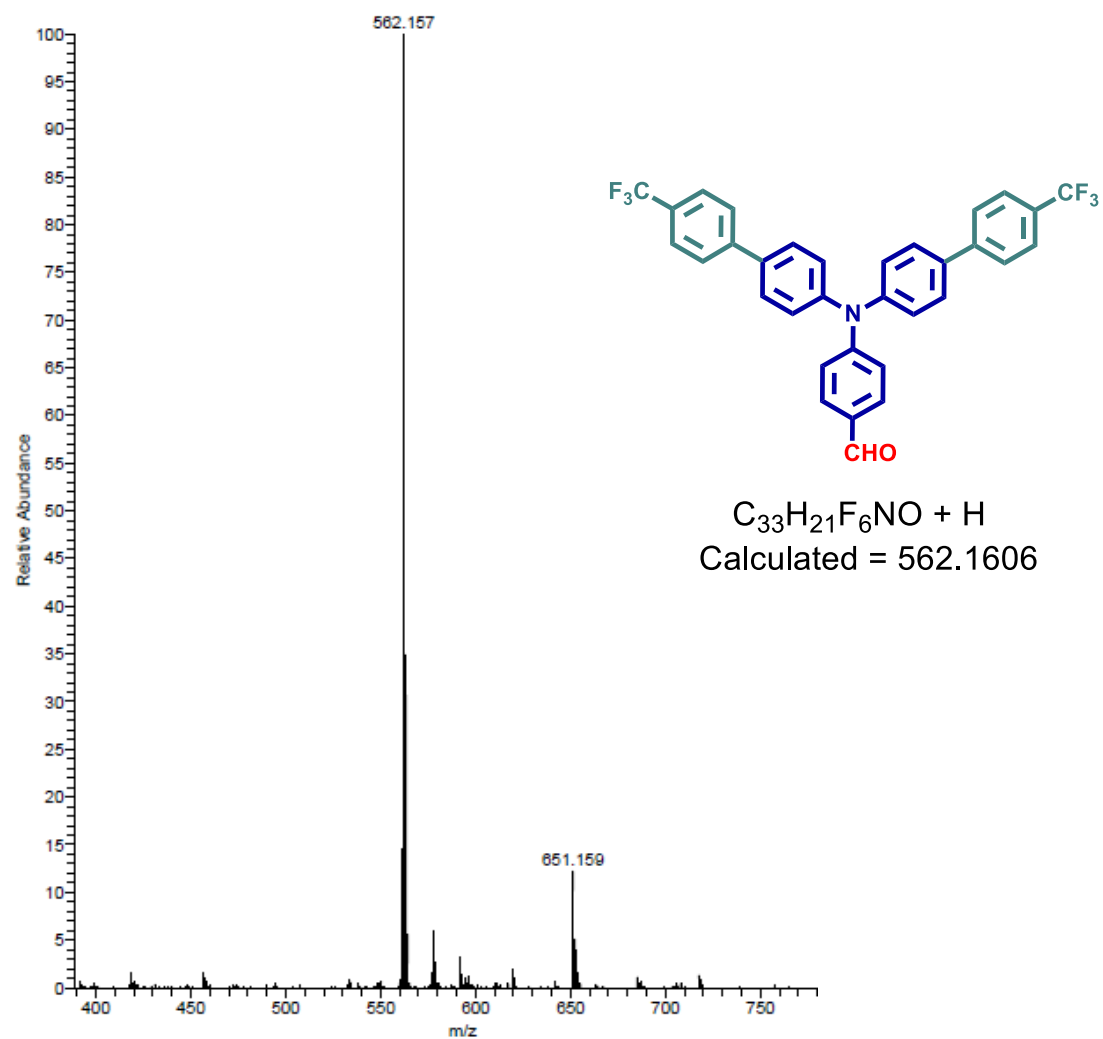

Figure S17. HR-Mass spectrum of **3e**.

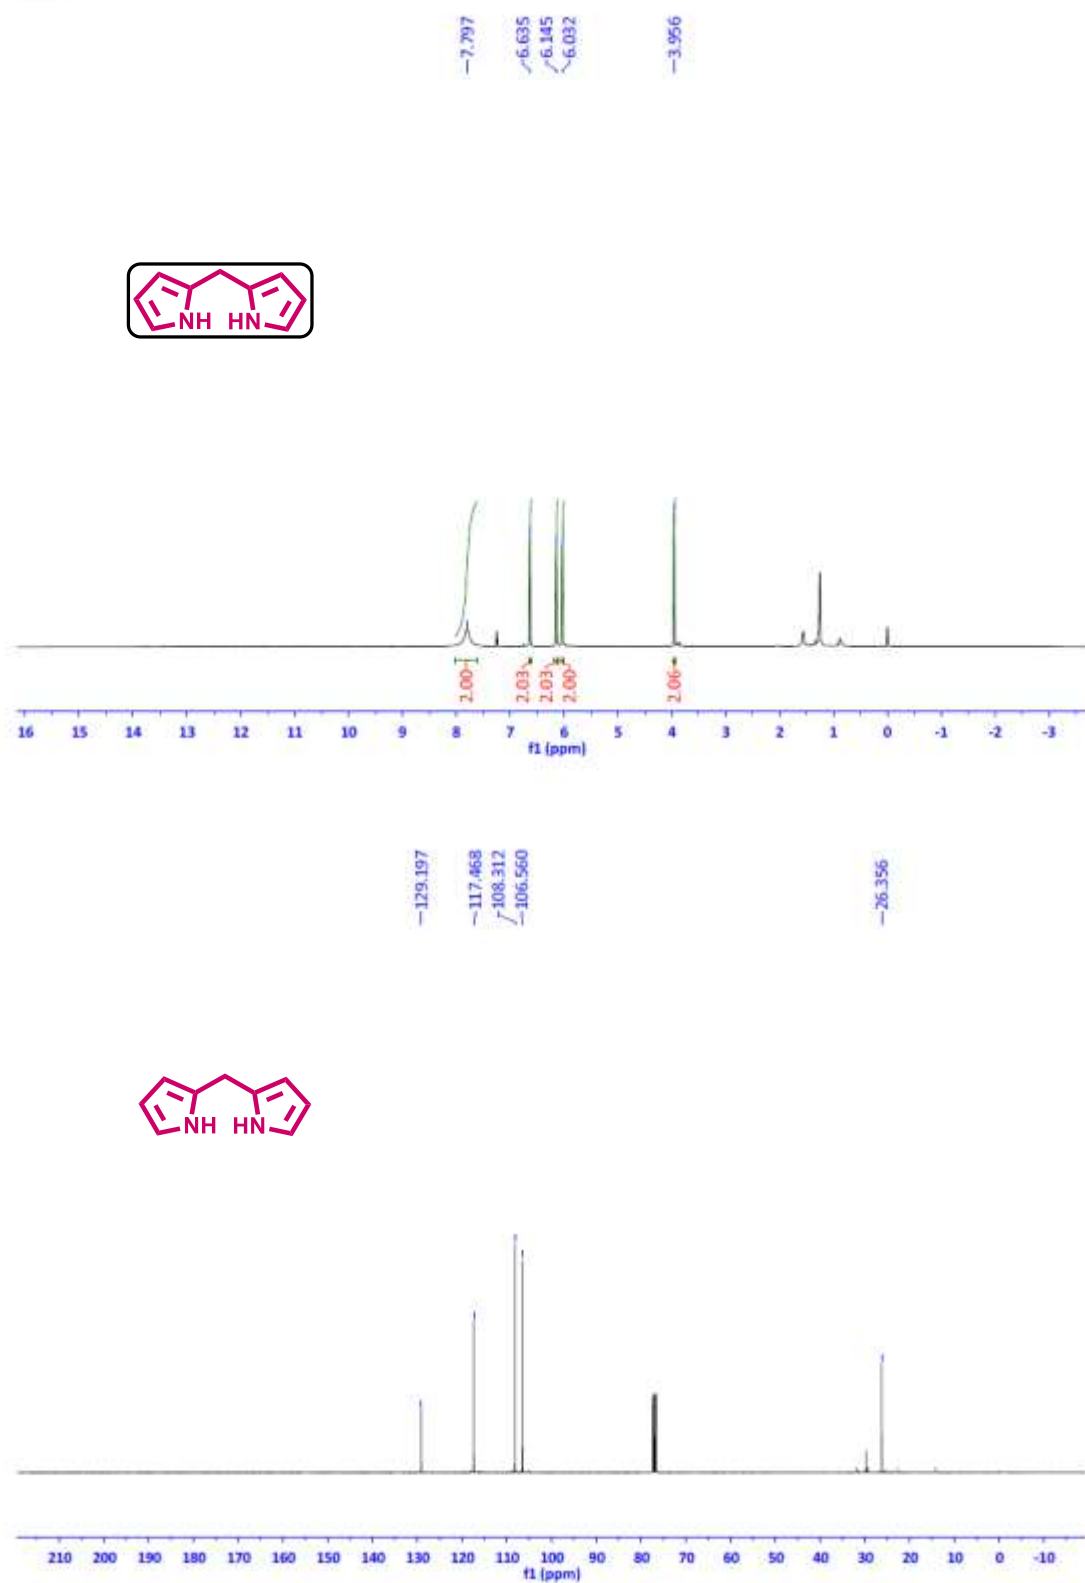

**Figure S18.**  $^1\text{H}$  NMR and  $^{13}\text{C}$  NMR spectra of **4**.



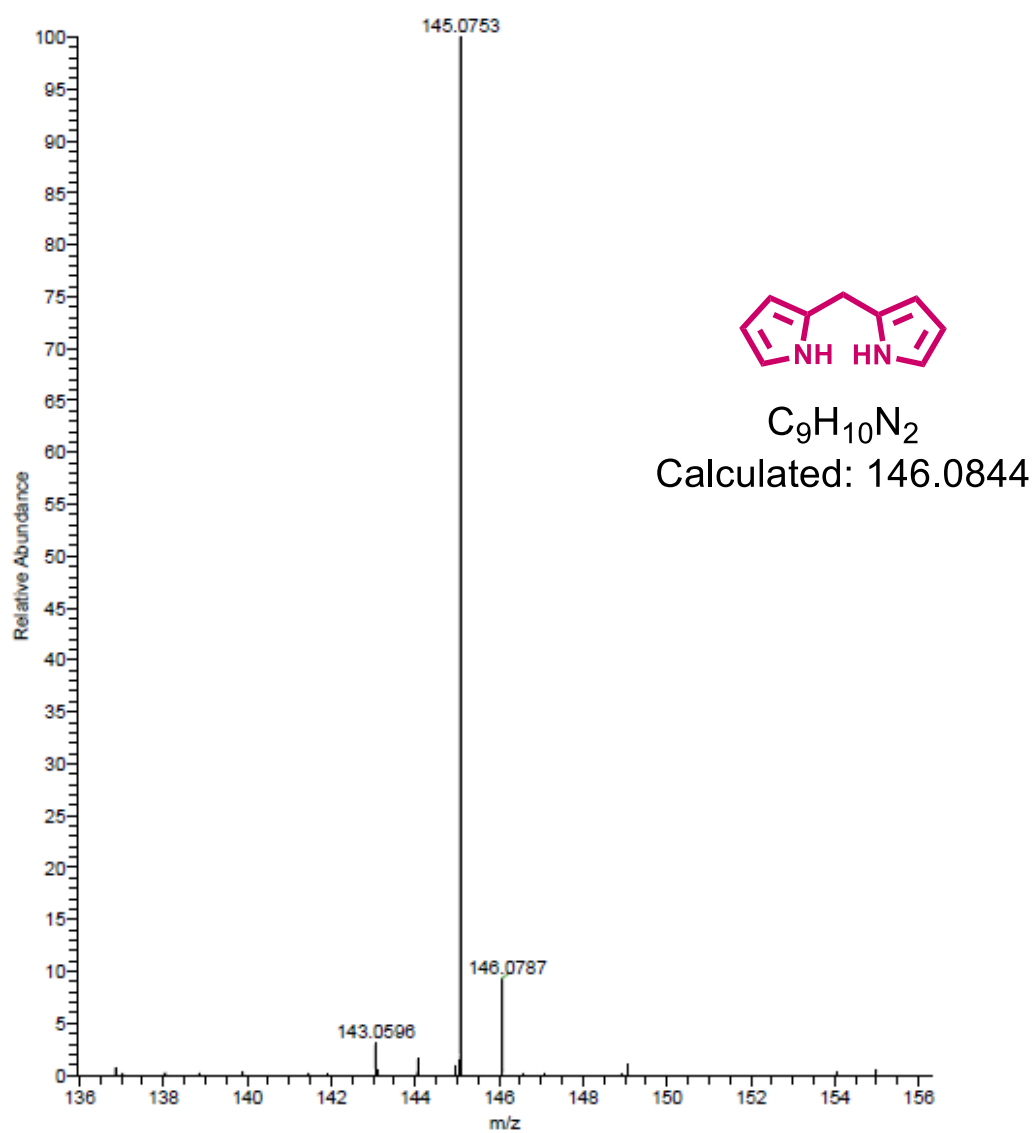

**Figure S19.** HR-Mass spectrum of compound **4**.

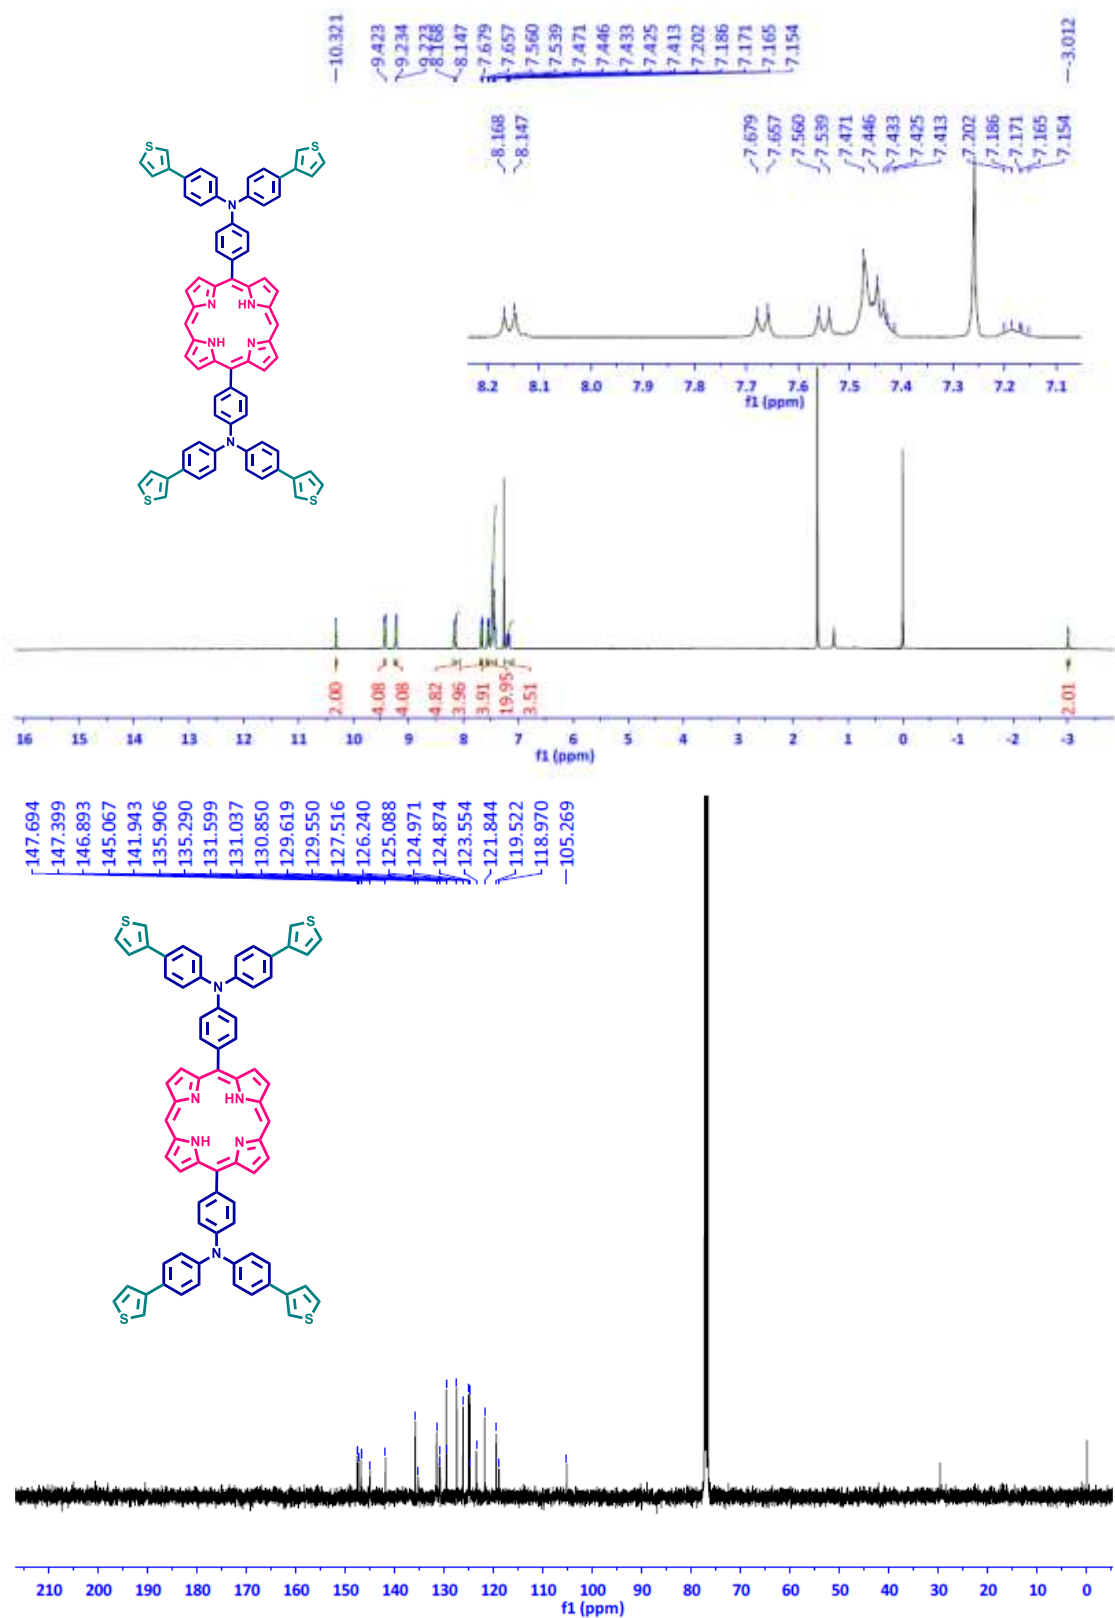

**Figure S20.**  $^1\text{H}$  NMR and  $^{13}\text{C}$  NMR spectra of **5a**.

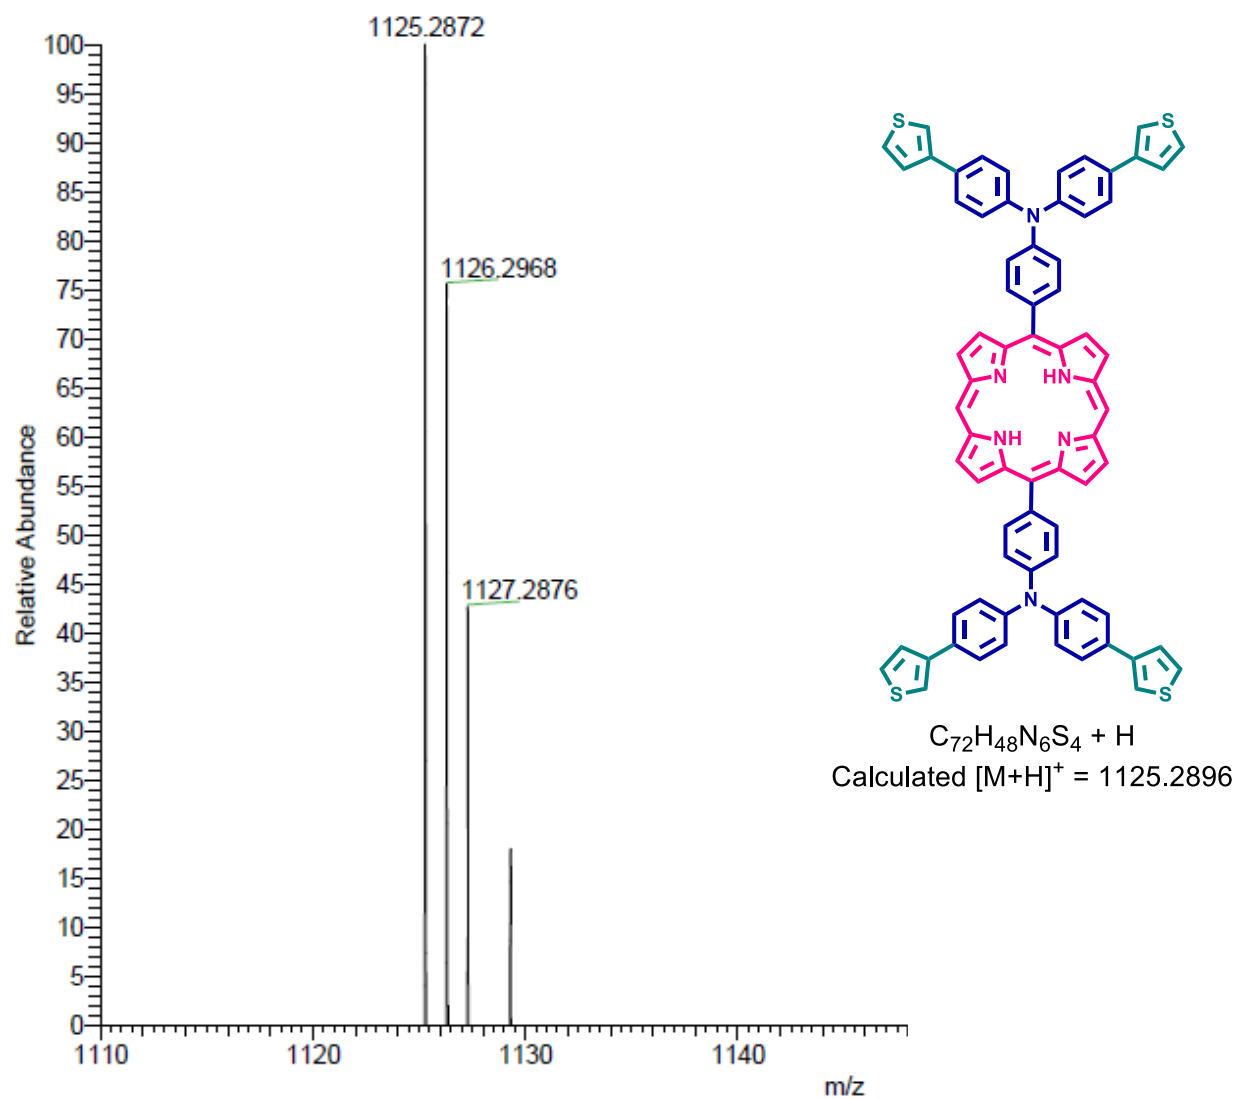

**Figure S21.** HR-Mass spectrum of **5a**

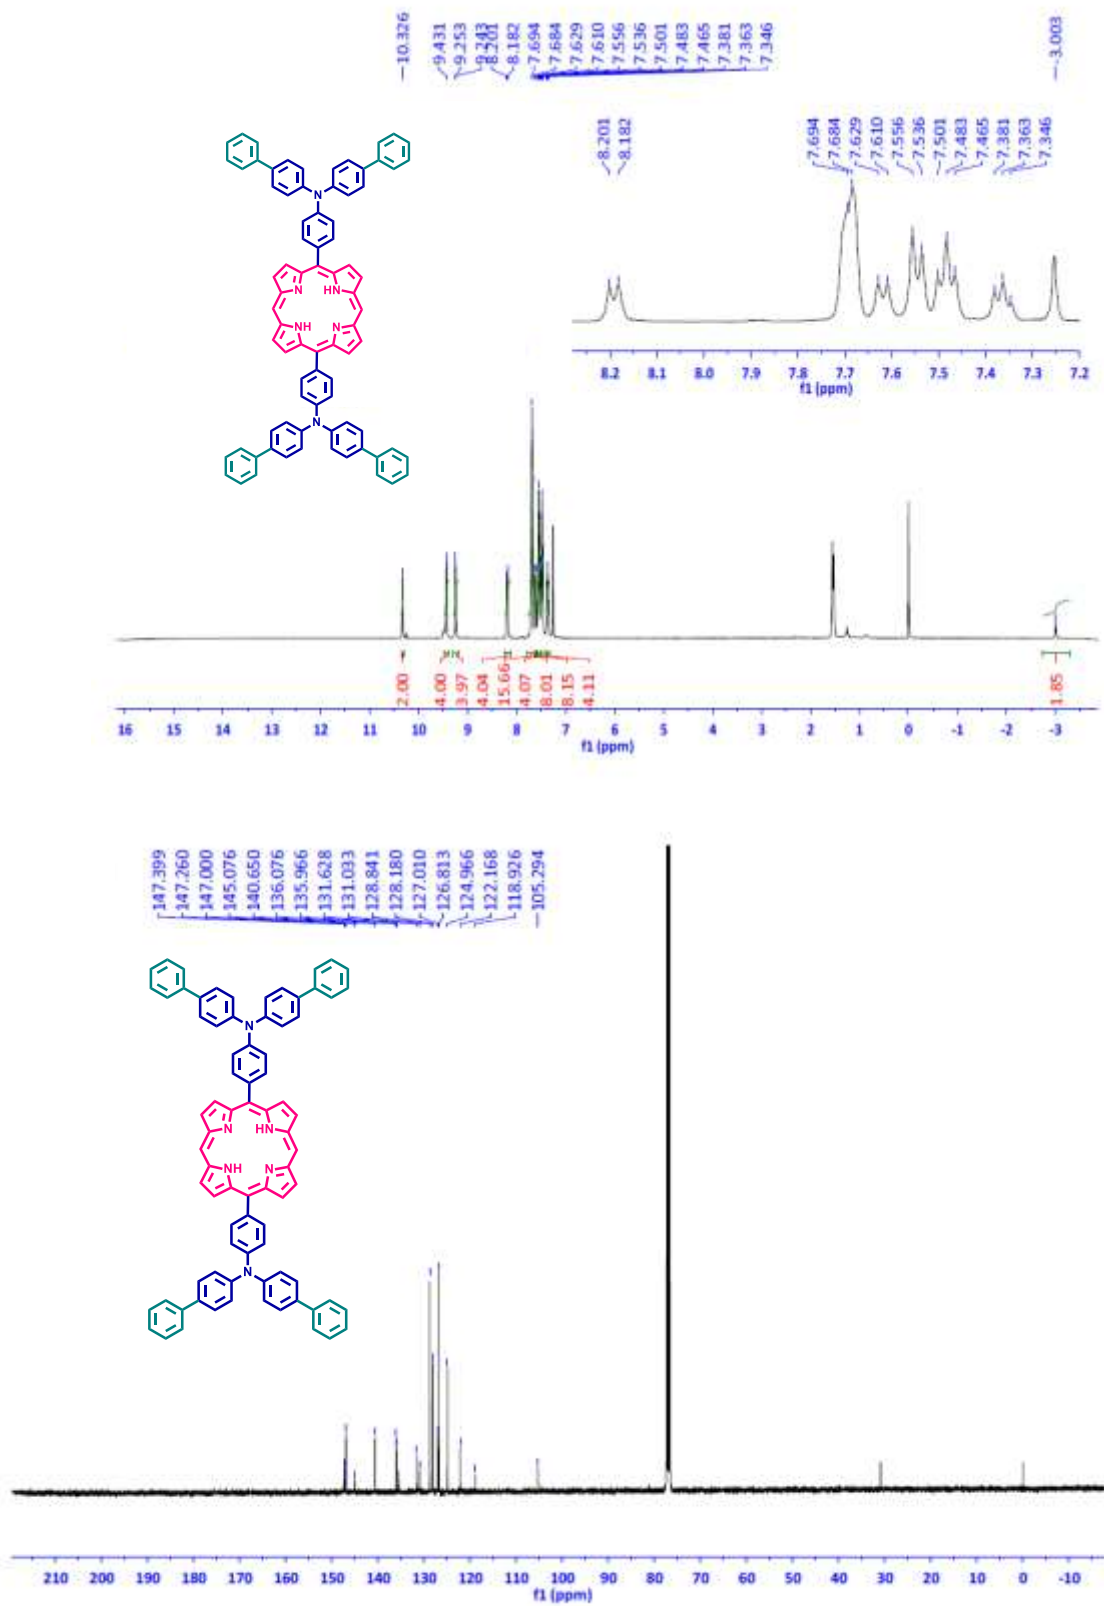

**Figure S22.** <sup>1</sup>H NMR and <sup>13</sup>C NMR spectra of **5b**

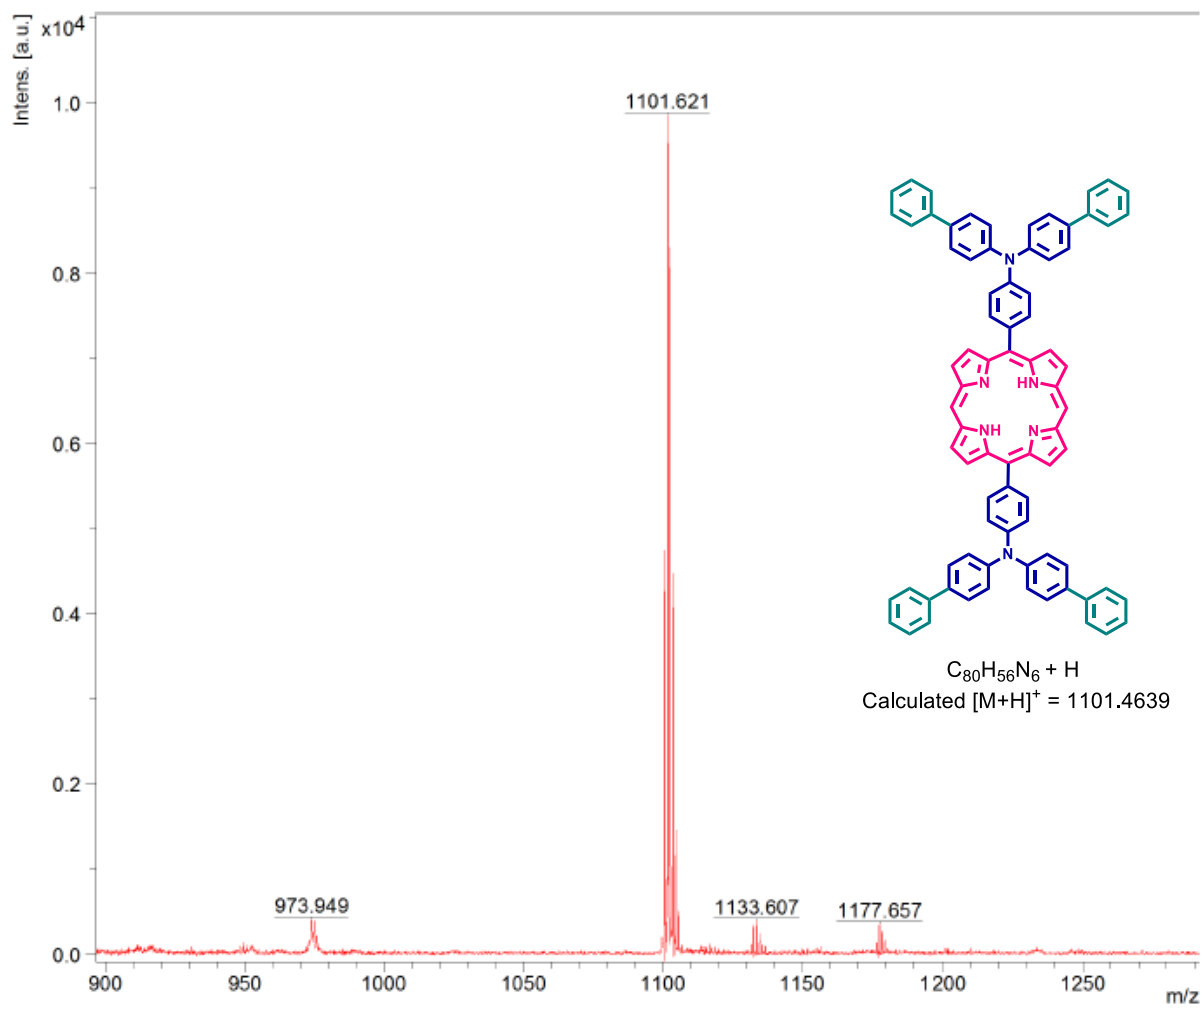

Figure S23. MALDI-TOF spectrum of **5b**.

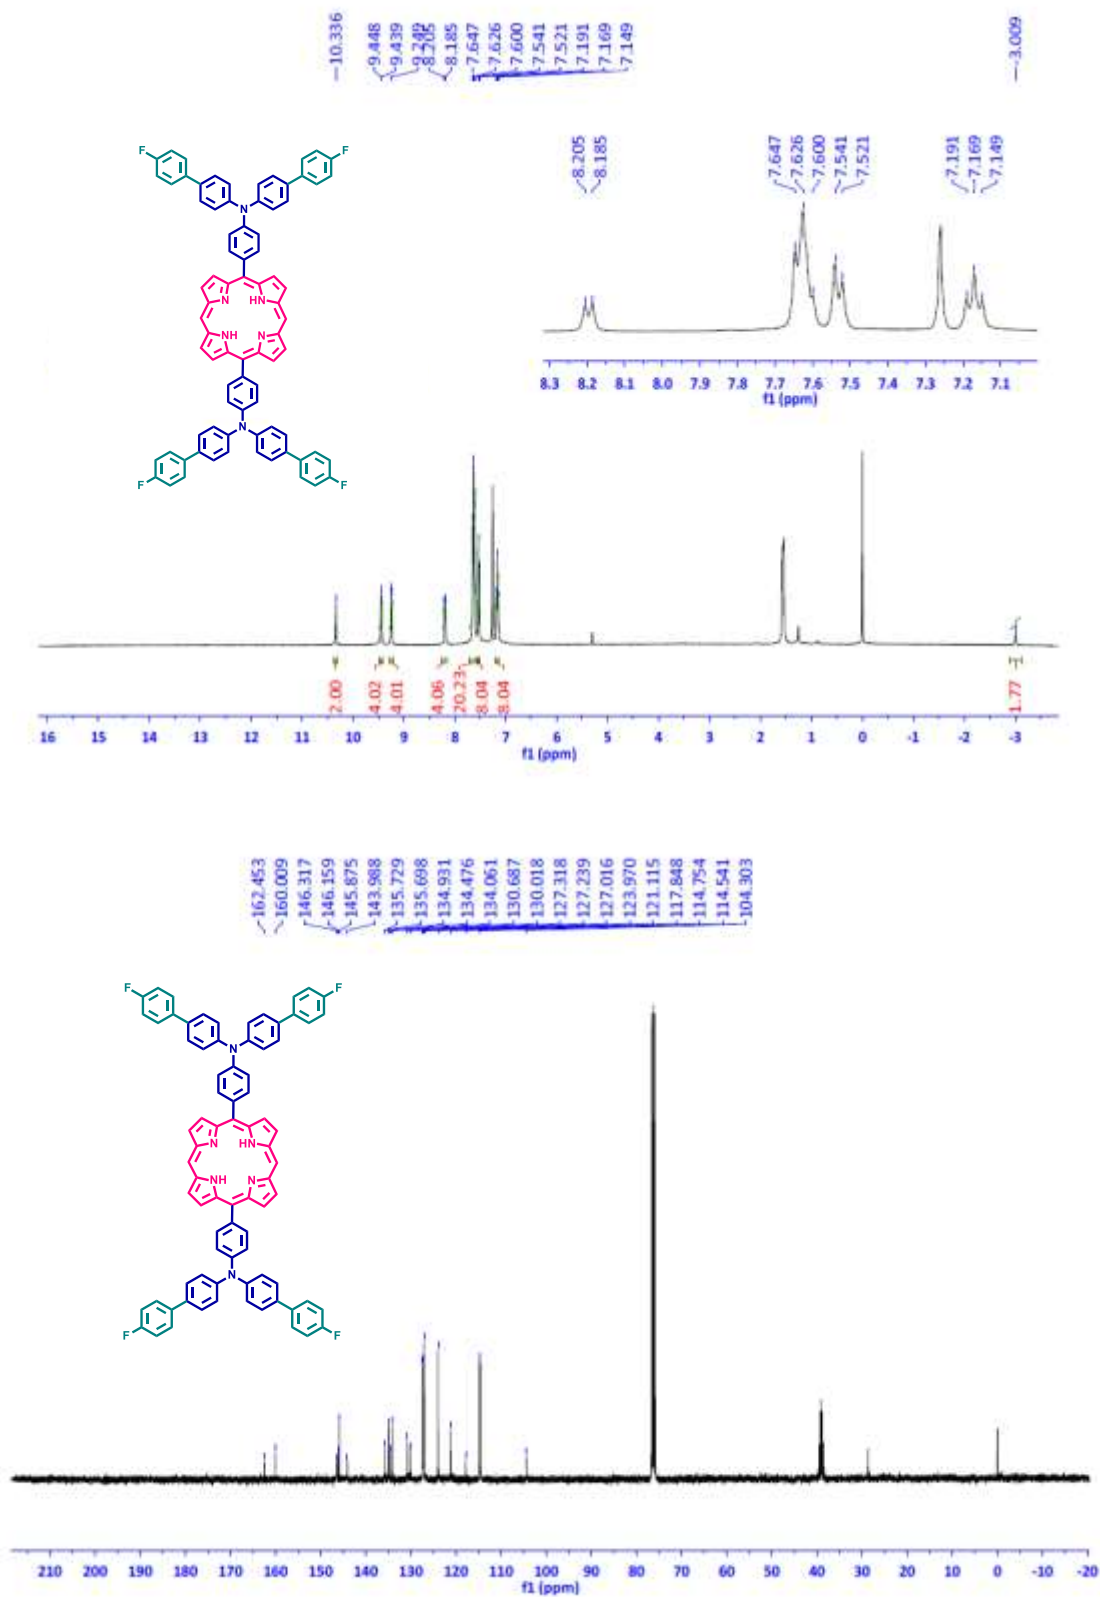

**Figure S24.** <sup>1</sup>H NMR and <sup>13</sup>C NMR spectra of **5c**.

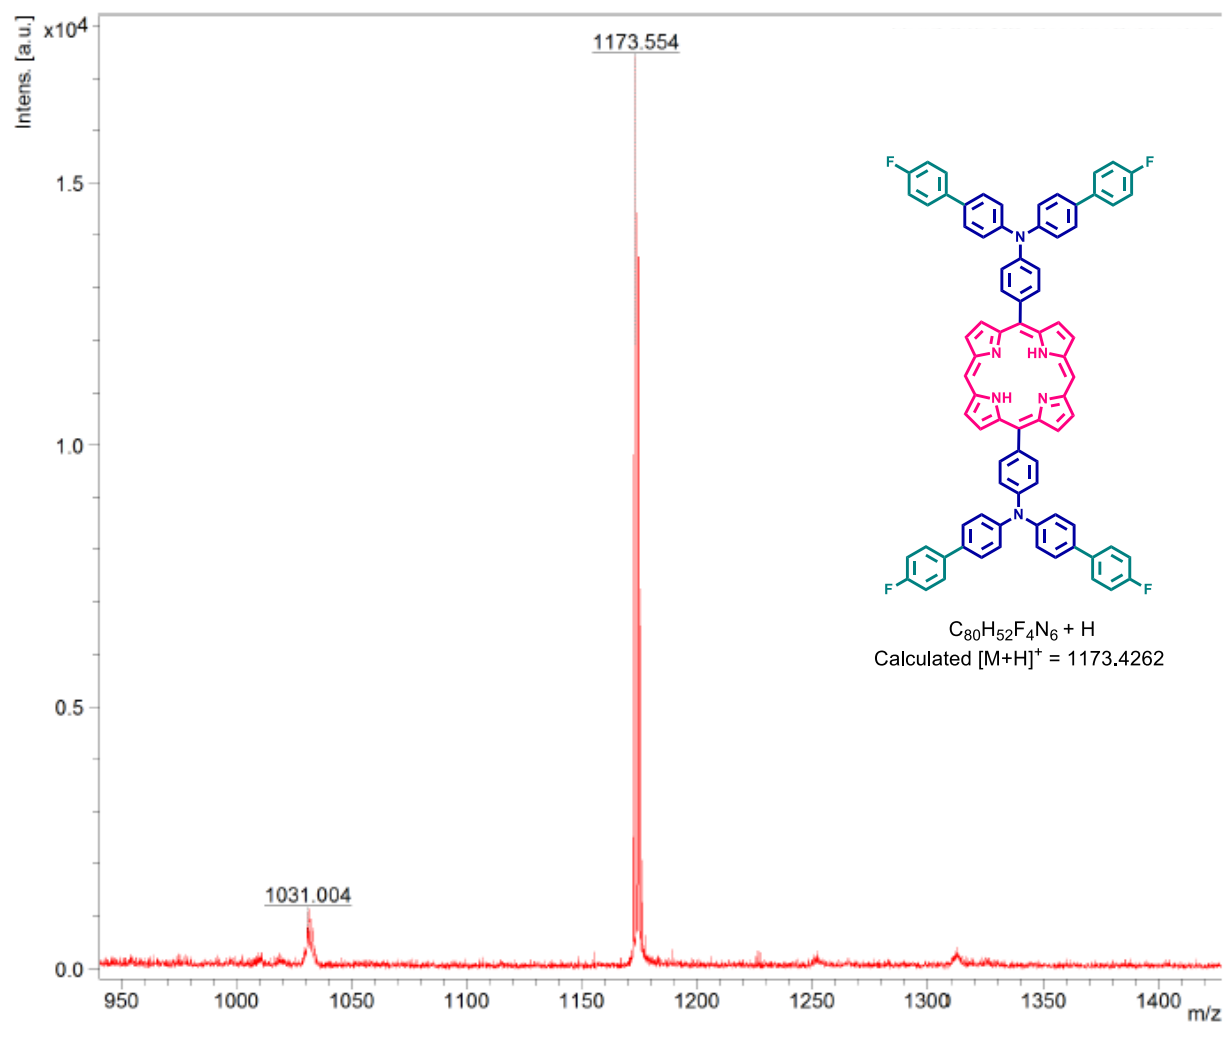

**Figure S25.** MALDI-TOF spectrum of **5c**.

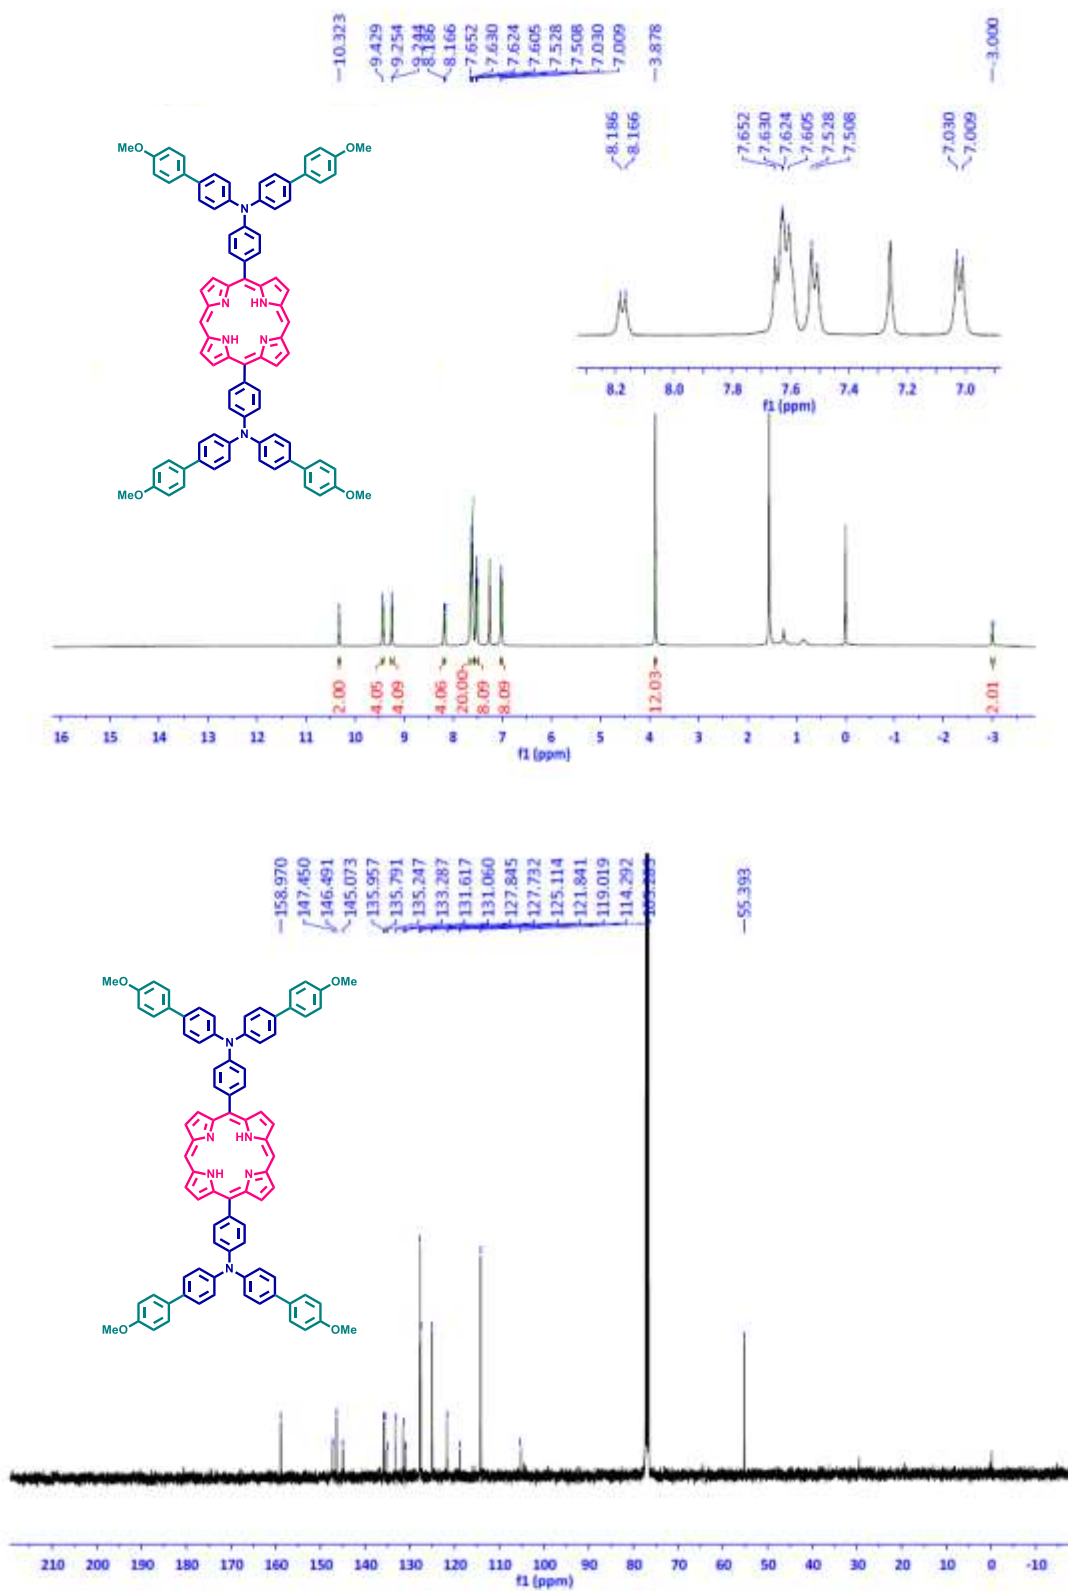

**Figure S26.**  $^1\text{H}$  NMR and  $^{13}\text{C}$  NMR spectra of **5d**.



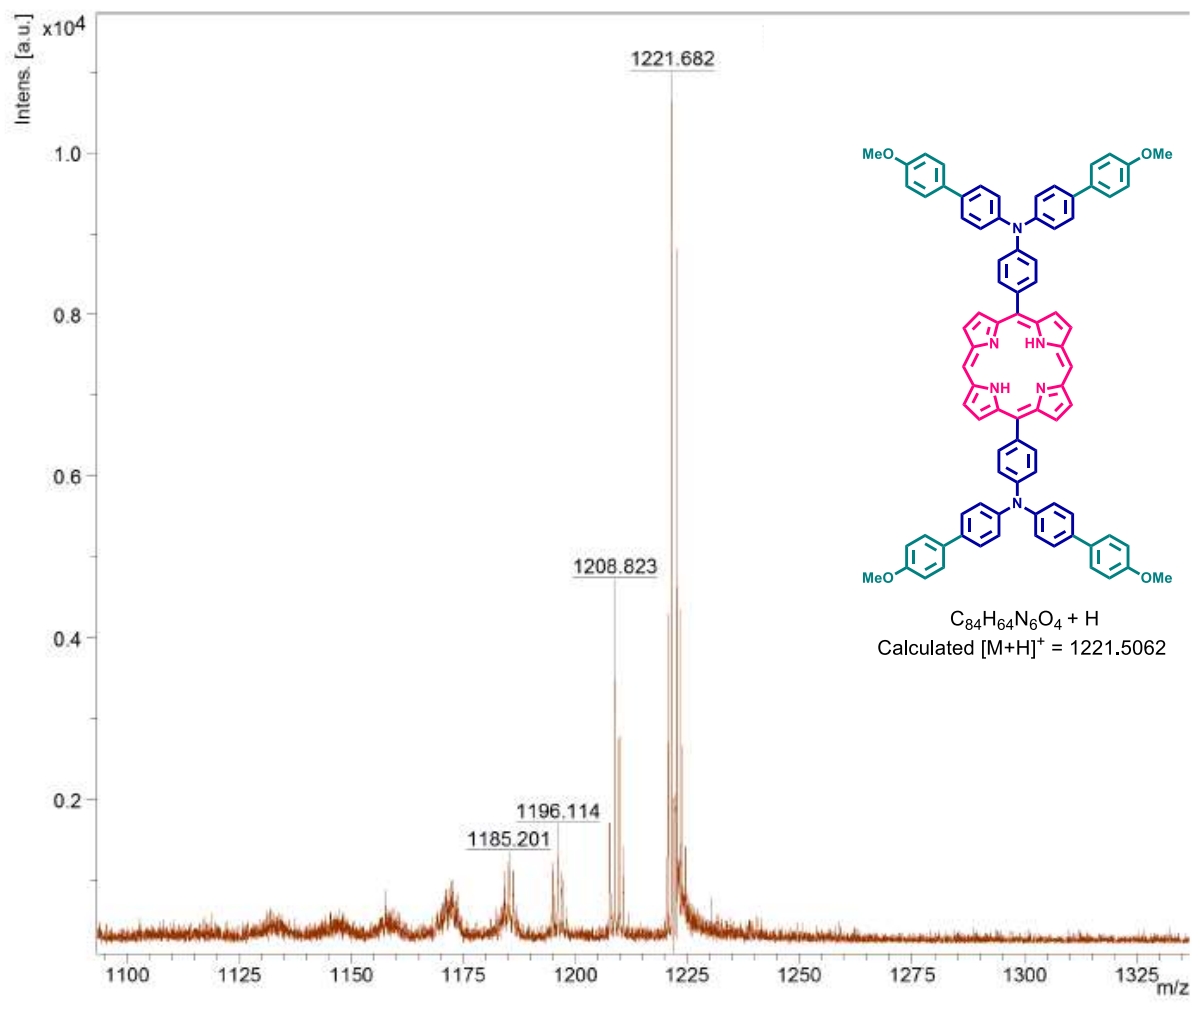

Figure S27. MALDI-TOF spectrum of **5d**.

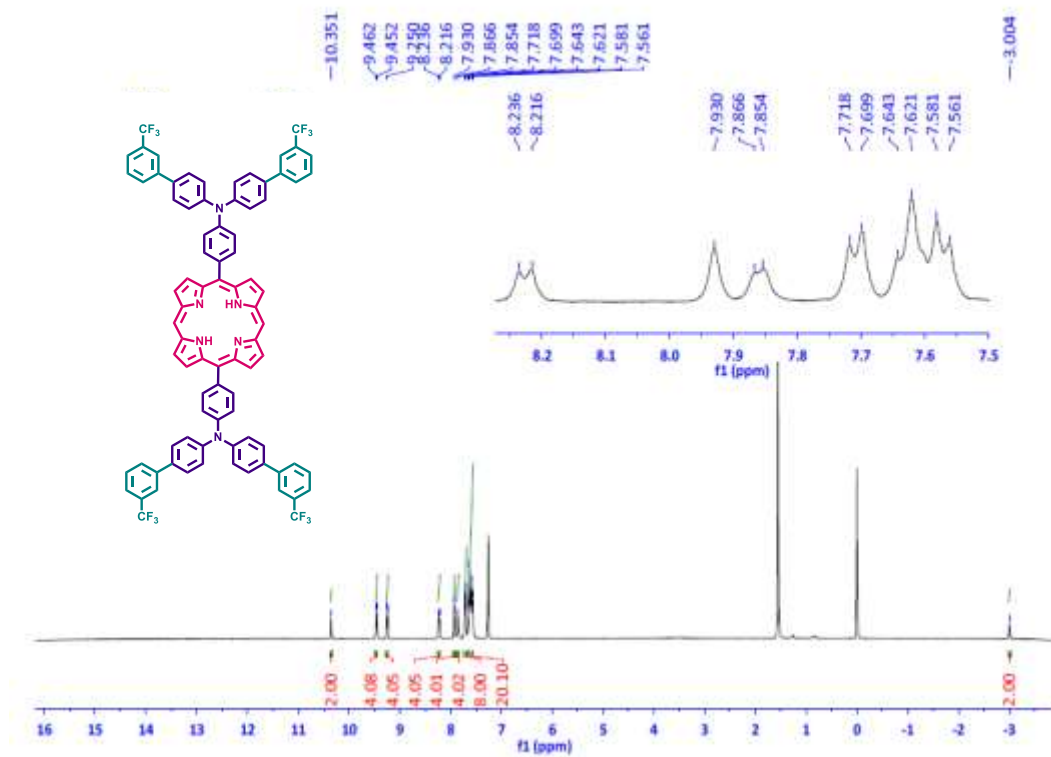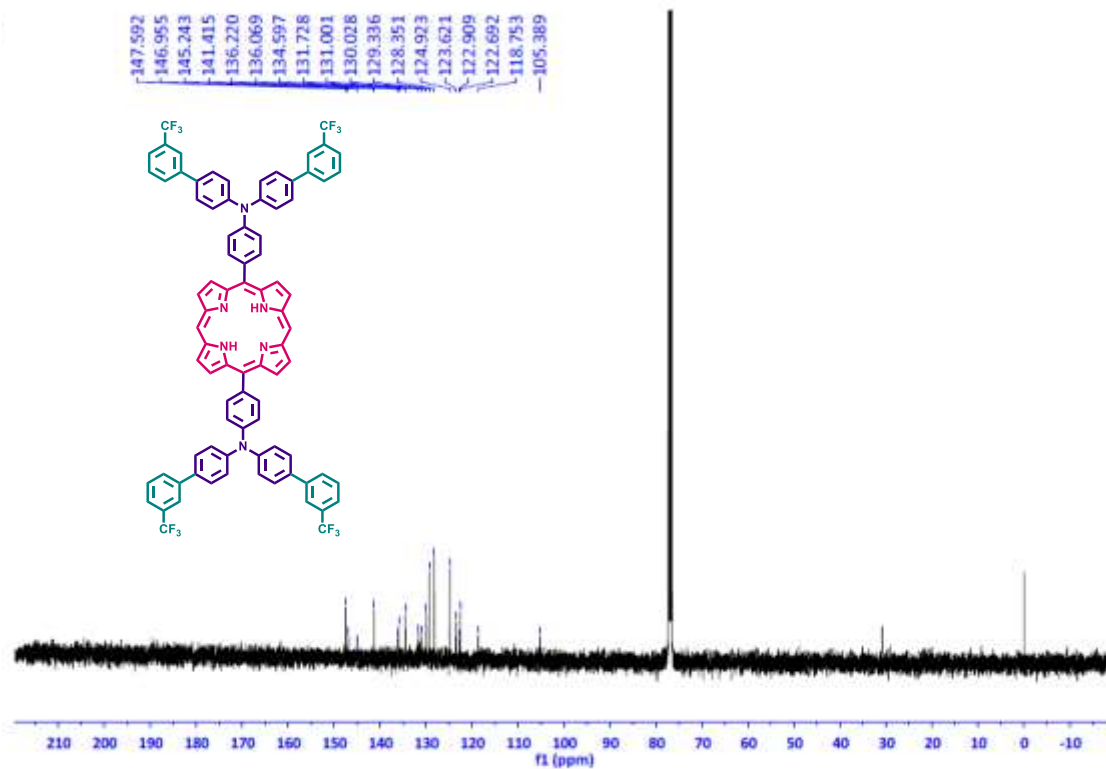

**Figure S28.** <sup>1</sup>H NMR and <sup>13</sup>C NMR spectra of **5e**.

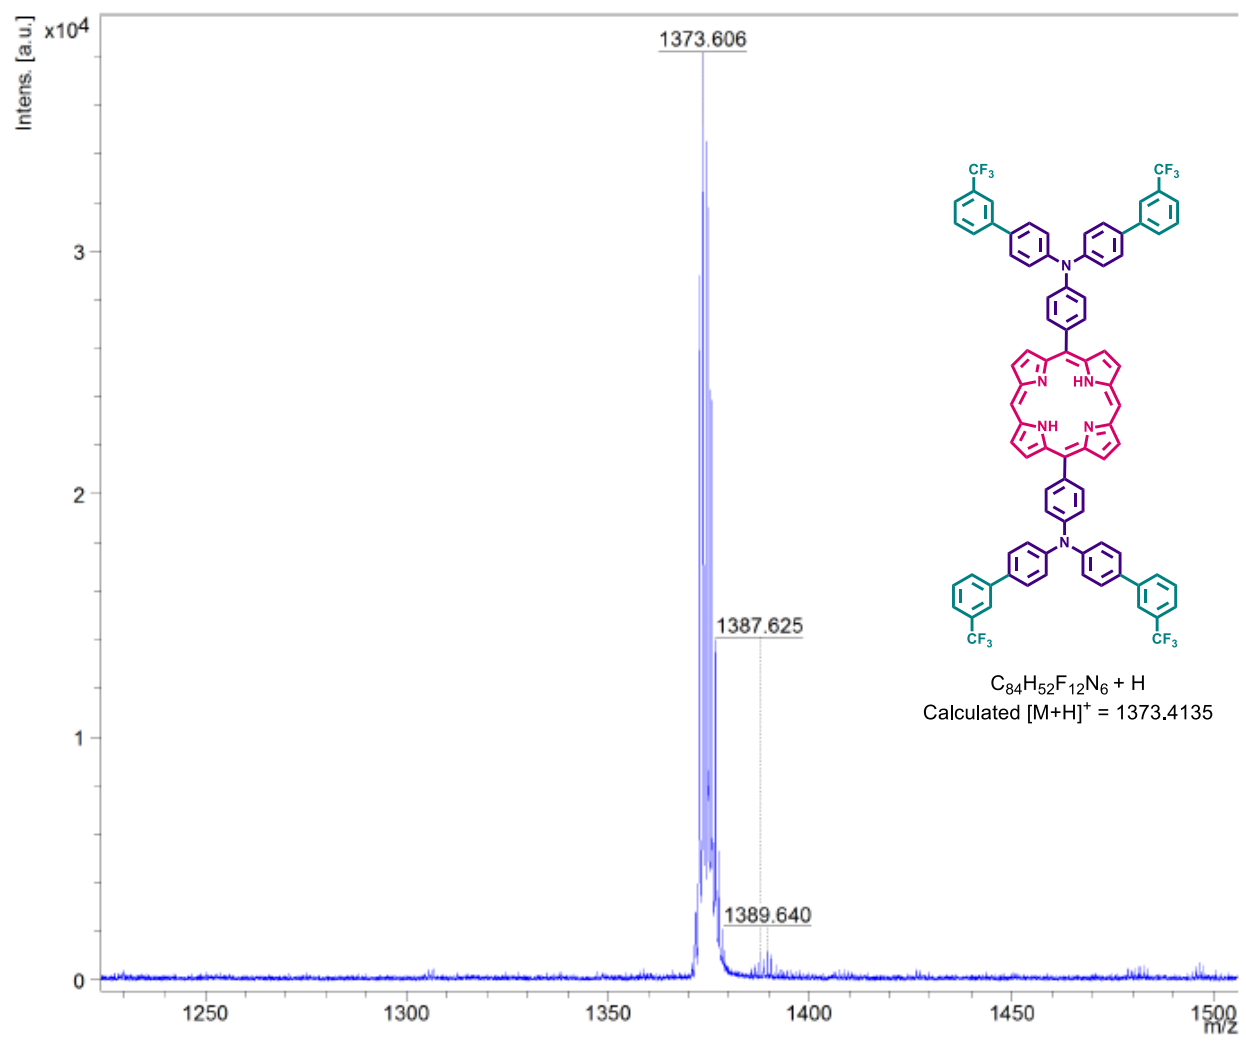

**Figure S29.** MALDI-TOF spectrum of **5e**.

## REFERENCES

- 
- (1) Lee, M. J.; Seo, K. D.; Song, H. M.; Kang, M. S.; Eom, Y. K.; Kang, H. S.; Kim, H. K. Novel D- $\pi$ -A System Based on Zinc-Porphyrin Derivatives for Highly Efficient Dye-Sensitized Solar Cells. *Tetrahedron Letters*. **2011**, 52, 3879–3882.
- (2) Cheng, X.; Li, Q.; Qin, J.; Li, Z. A New Approach to Design Ratiometric Fluorescent Probe for Mercury(II) Based on the Hg<sup>2+</sup>-Promoted Deprotection of Thioacetals. *ACS Applied Materials & Interfaces*. **2010**, 2, 1066–1072.
- (3) Frost, J. R.; Huber, S. M.; Breitenlechner, S.; Bannwarth, C.; Bach, T. Enantiotopos-Selective CH Oxygenation Catalyzed by a Supramolecular Ruthenium Complex. *Angew. Chem. Int. Ed.* **2014**, 53, 1–6.
- (4) Liu, B.; Zhu, W.; Wang, Y.; Wu, W.; Li, X.; Chen, B.; Long, Y.T.; and Xie, Y. Modulation of Energy Levels By Donor Groups: An Effective Approach for Optimizing the Efficiency of Zinc-Porphyrin Based Solar Cells. *J. Mater. Chem.* **2012**, 22, 7434–7444.
